# Supplementary material for: Global Anthropogenic Emissions (CAMS-GLOB-ANT) for the Copernicus Atmosphere Monitoring Service Simulations of Air Quality Forecasts and Reanalyses
Source: Copernicus journal article supplement (doi:10.5194/essd-2023-306), 2023-08-31

## Supplement Tables

Table S1: Sector correspondence between CAMS-GLOB-ANT, EDGARv5 and CEDS sectors

5

| CAMS-GLOB-ANTv5 sectors           | EDGARv5 Sectors             | CEDS sectors                                | Species                                                                                                                                                                           |
|-----------------------------------|-----------------------------|---------------------------------------------|-----------------------------------------------------------------------------------------------------------------------------------------------------------------------------------|
| <b>Power generation (ENE)</b>     | ene                         | 1A1a Electricity-autoproducer               | CO <sub>2</sub> excluding short cycle, CO <sub>2</sub> organic cycle, CH <sub>4</sub> , N <sub>2</sub> O, BC, CO, NH <sub>3</sub> , NMVOCs, NO <sub>x</sub> , OC, SO <sub>2</sub> |
|                                   |                             | 1A1a Electricity-public                     |                                                                                                                                                                                   |
|                                   |                             | 1A1a Heat-production                        |                                                                                                                                                                                   |
|                                   |                             | 1A5 Other-unspecified                       |                                                                                                                                                                                   |
| <b>Refineries (REF)</b>           | ref_trf                     | 1A1bc_Other-transformation                  | CO <sub>2</sub> excluding short cycle, CO <sub>2</sub> organic cycle, CH <sub>4</sub> , N <sub>2</sub> O, BC, CO, NH <sub>3</sub> , NMVOCs, NO <sub>x</sub> , OC, SO <sub>2</sub> |
| <b>Industrial processes (IND)</b> | ind                         | 1A2a Ind-Comb-Iron-steel                    | CO <sub>2</sub> excluding short cycle, CO <sub>2</sub> organic cycle, CH <sub>4</sub> , N <sub>2</sub> O, BC, CO, NH <sub>3</sub> , NMVOCs, NO <sub>x</sub> , OC, SO <sub>2</sub> |
|                                   |                             | 1A2b Ind-Comb-Non-ferrous-metals            |                                                                                                                                                                                   |
|                                   |                             | 1A2c Ind-Comb-Chemicals                     |                                                                                                                                                                                   |
|                                   |                             | 1A2d Ind-Comb-Pulp-paper                    |                                                                                                                                                                                   |
|                                   |                             | 1A2e Ind-Comb-Food-tobacco                  |                                                                                                                                                                                   |
|                                   |                             | 1A2f Ind-Comb-Non-metalic-minerals          |                                                                                                                                                                                   |
|                                   |                             | 1A2g Ind-Comb-Construction                  |                                                                                                                                                                                   |
|                                   |                             | 1A2g Ind-Comb-machinery                     |                                                                                                                                                                                   |
|                                   |                             | 1A2g Ind-Comb-mining-quarrying              |                                                                                                                                                                                   |
|                                   |                             | 1A2g Ind-Comb-other                         |                                                                                                                                                                                   |
|                                   |                             | 1A2g Ind-Comb-textile-leather               |                                                                                                                                                                                   |
|                                   |                             | 1A2g Ind-Comb-transpequip                   |                                                                                                                                                                                   |
|                                   | 1A2g Ind-Comb-wood-products |                                             |                                                                                                                                                                                   |
|                                   | nmm                         | 2A1 Cement-production                       | CO <sub>2</sub> excluding short cycle, BC, CO, NH <sub>3</sub> , NMVOCs, SO <sub>2</sub>                                                                                          |
|                                   |                             | 2A2 Lime-production                         |                                                                                                                                                                                   |
|                                   |                             | 2Ax Other-minerals                          |                                                                                                                                                                                   |
|                                   | che                         | 2B Chemical-industry                        | CO <sub>2</sub> excluding short cycle, CH <sub>4</sub> , N <sub>2</sub> O, BC, CO, NH <sub>3</sub> , NMVOCs, NO <sub>x</sub> , OC, SO <sub>2</sub>                                |
|                                   |                             | 2B2 Chemicals-Nitric-acid                   |                                                                                                                                                                                   |
|                                   |                             | 2B3 Chemicals-Adipic-acid                   |                                                                                                                                                                                   |
|                                   |                             | 2D_Chemical-products-manufacture-processing |                                                                                                                                                                                   |
| iro                               |                             | 2C_Metal-production                         | CO <sub>2</sub> excluding short cycle, CH <sub>4</sub> , BC, CO, NH <sub>3</sub> , NMVOCs, NO <sub>x</sub> , OC, SO <sub>2</sub>                                                  |
| foo_pap                           |                             | 2H_Pulp-and-paper-food-beverage-wood        | BC, CO, NMVOCs, NO <sub>x</sub> , SO <sub>2</sub>                                                                                                                                 |

|                                                                     |                                |                                     |                                                                                                                                                                                              |
|---------------------------------------------------------------------|--------------------------------|-------------------------------------|----------------------------------------------------------------------------------------------------------------------------------------------------------------------------------------------|
|                                                                     | nfe                            | Not in CEDS                         | CO <sub>2</sub> _excluding_short_cycle,<br>BC, CO, NO <sub>x</sub> , SO <sub>2</sub>                                                                                                         |
| <b>Road transportation (TRO)</b>                                    | tro_res                        | 1A3b Road                           | BC, OC                                                                                                                                                                                       |
|                                                                     | tro_nores                      | 1A3b_Road                           | CO <sub>2</sub> _excluding_short_cycle,<br>CO <sub>2</sub> _organic_cycle, CH <sub>4</sub> ,<br>N <sub>2</sub> O, BC, CO, NH <sub>3</sub> ,<br>NMVOCs, NO <sub>x</sub> , OC, SO <sub>2</sub> |
| <b>Non-road transportation (TNR)</b>                                | tnr_other                      | 1A3c Rail                           | CO <sub>2</sub> _excluding_short_cycle,<br>CO <sub>2</sub> _organic_cycle, CH <sub>4</sub> ,<br>N <sub>2</sub> O, BC, CO, NH <sub>3</sub> ,<br>NMVOCs, NO <sub>x</sub> , OC, SO <sub>2</sub> |
|                                                                     |                                | 1A3eii_Other-transp                 |                                                                                                                                                                                              |
| <b>Ships (SHP)</b>                                                  | tnr_ship                       | 1A3di Oil Tanker Loading            | CO <sub>2</sub> _excluding_short_cycle,<br>CH <sub>4</sub> , BC, CO, NMVOCs,<br>NO <sub>x</sub> , OC, SO <sub>2</sub>                                                                        |
|                                                                     |                                | 1A3dii_Domestic-navigation          |                                                                                                                                                                                              |
| <b>Residential (RCO)</b>                                            | rco                            | 1A4a Commercial-institutional       | CO <sub>2</sub> _excluding_short_cycle,<br>CO <sub>2</sub> _organic_cycle, CH <sub>4</sub> ,<br>N <sub>2</sub> O, BC, CO, NH <sub>3</sub> ,<br>NMVOCs, NO <sub>x</sub> , OC, SO <sub>2</sub> |
|                                                                     |                                | 1A4b_Residential                    |                                                                                                                                                                                              |
| <b>Fugitives emissions from fuels (FEF)</b>                         | fff                            | 7A_Fossil-fuel-fires                | CO <sub>2</sub> _excluding_short_cycle,<br>CH <sub>4</sub> , N <sub>2</sub> O, BC, CO,<br>NMVOCs, NO <sub>x</sub> , OC, SO <sub>2</sub>                                                      |
|                                                                     | pro                            | 1B1 Fugitive-solid-fuels            | CO <sub>2</sub> _excluding_short_cycle,<br>CH <sub>4</sub> , N <sub>2</sub> O, BC, CO,<br>NMVOCs, NO <sub>x</sub> , OC, SO <sub>2</sub>                                                      |
|                                                                     |                                | 1B2 Fugitive-petr                   |                                                                                                                                                                                              |
|                                                                     |                                | 1B2b Fugitive-NG-distr              |                                                                                                                                                                                              |
|                                                                     |                                | 1B2d Fugitive-other-energy          |                                                                                                                                                                                              |
| <b>Fugitives emissions for methane (FEF_COAL, FEF_GAS, FEF_OIL)</b> | pro_coal<br>pro_oil<br>pro_gas | 1B1 Fugitive-solid-fuels            | CH <sub>4</sub>                                                                                                                                                                              |
|                                                                     |                                | 1B2 Fugitive-petr                   |                                                                                                                                                                                              |
|                                                                     |                                | 1B2b Fugitive-NG-distr              |                                                                                                                                                                                              |
|                                                                     |                                | 1B2b Fugitive-NG-prod               |                                                                                                                                                                                              |
|                                                                     |                                | 1B2d Fugitive-other-energy          |                                                                                                                                                                                              |
| <b>Solvents application and production (SLV)</b>                    | pru_sol                        | 2D Degreasing-Cleaning              | CO <sub>2</sub> _excluding_short_cycle,<br>N <sub>2</sub> O, NH <sub>3</sub> , NMVOCs                                                                                                        |
|                                                                     |                                | 2D Other-product-use                |                                                                                                                                                                                              |
|                                                                     |                                | 2D_Paint-application                |                                                                                                                                                                                              |
| <b>Agriculture livestock (AGL)</b>                                  | mnm                            | 3B_Manure-management                | CH <sub>4</sub> , N <sub>2</sub> O, NH <sub>3</sub> , NMVOCs,<br>NO <sub>x</sub>                                                                                                             |
|                                                                     | enf                            | 3E_Enteric-fermentation             |                                                                                                                                                                                              |
| <b>Agriculture soils (AGS)</b>                                      | ags                            | 1A4c Agriculture-forestry-fishing   | CO <sub>2</sub> _excluding_short_cycle,<br>CH <sub>4</sub> , N <sub>2</sub> O, NH <sub>3</sub> , NO <sub>x</sub>                                                                             |
|                                                                     |                                | 3D Rice-Cultivation                 |                                                                                                                                                                                              |
|                                                                     |                                | 3D Soil-emissions                   |                                                                                                                                                                                              |
|                                                                     |                                | 3I Agriculture-other                |                                                                                                                                                                                              |
|                                                                     | ide                            | 7BC_Indirect-N2O-non-agricultural-N |                                                                                                                                                                                              |
|                                                                     | swd ldf                        | 5A Solid-waste-disposal             |                                                                                                                                                                                              |

|                                                                        |         |                                   |                                                                                                                                                                                     |
|------------------------------------------------------------------------|---------|-----------------------------------|-------------------------------------------------------------------------------------------------------------------------------------------------------------------------------------|
| <b>Solid waste and wastewater handling (SWD)</b>                       | swd_inc | 5C Waste-combustion               | CO <sub>2</sub> _excluding_short_cycle, CO <sub>2</sub> _organic_cycle, CH <sub>4</sub> , N <sub>2</sub> O, BC, CO, NH <sub>3</sub> , NMVOCs, NO <sub>x</sub> , OC, SO <sub>2</sub> |
|                                                                        |         | 5E_Other-waste-handling           |                                                                                                                                                                                     |
|                                                                        | wwt     | 5D Wastewater-handling            | NH <sub>3</sub> , NMVOCs                                                                                                                                                            |
| <b>Agriculture waste burning (AWB)</b>                                 | awb     | Not in CEDS                       | CH <sub>4</sub> , N <sub>2</sub> O, BC, CO, NH <sub>3</sub> , NMVOCs, NO <sub>x</sub> , OC, SO <sub>2</sub>                                                                         |
| <b>Indirect emissions from NO<sub>x</sub> and NH<sub>3</sub> (DEP)</b> | Ide     | 7BC_Indirect-N2O-non-agricultural | N <sub>2</sub> O                                                                                                                                                                    |

Table S2: List of VOCs considered in the inventory and corresponding sectors

| Name  | Real name         | ENE | RCO | TRO | TNR | FEF | SLV | AGR | SHP | SWD |
|-------|-------------------|-----|-----|-----|-----|-----|-----|-----|-----|-----|
| voc1  | Alcohols          | X   | X   | X   | X   | X   | X   |     | X   | X   |
| voc2  | Ethane            | X   | X   | X   | X   | X   | X   | X   | X   | X   |
| voc3  | Propane           | X   | X   | X   | X   | X   | X   | X   | X   | X   |
| voc4  | Butanes           | X   | X   | X   |     | X   | X   | X   |     | X   |
| voc5  | Pentanes          | X   | X   | X   | X   | X   | X   | X   | X   | X   |
| voc6  | Hexanes           | X   | X   | X   | X   | X   | X   | X   | X   | X   |
| voc7  | Ethene            | X   | X   | X   | X   | X   | X   | X   | X   | X   |
| voc8  | Propene           | X   | X   | X   | X   | X   | X   | X   | X   | X   |
| voc9  | Ethyne            | X   | X   | X   | X   | X   | X   | X   | X   | X   |
| voc10 | Isoprenes         | X   | X   | X   | X   | X   | X   | X   | X   | X   |
| voc11 | Monoterpenes      | X   | X   | X   | X   |     | X   | X   | X   | X   |
| voc12 | Other alkadienes  | X   | X   | X   | X   | X   | X   | X   | X   | X   |
| voc13 | Benzene           | X   | X   | X   | X   | X   | X   | X   | X   | X   |
| voc14 | Methylbenzene     | X   | X   | X   | X   | X   | X   | X   | X   | X   |
| voc15 | Dimethylbenzenes  | X   | X   | X   | X   | X   | X   | X   | X   | X   |
| voc16 | Trimethylbenzenes | X   | X   | X   | X   | X   | X   | X   | X   |     |
| voc17 | Other aromatics   | X   | X   | X   | X   | X   | X   | X   | X   | X   |
| voc18 | Esters            | X   | X   | X   | X   | X   | X   |     | X   | X   |
| voc19 | Ethers            | X   | X   | X   | X   | X   | X   | X   | X   | X   |
| voc20 | Chlorinated       | X   | X   | X   | X   | X   | X   |     | X   |     |
| voc21 | Methanal          | X   | X   | X   | X   | X   | X   | X   | X   | X   |
| voc22 | Other alkanals    | X   | X   | X   | X   | X   | X   | X   | X   | X   |
| voc23 | Alkanones         | X   | X   | X   | X   | X   | X   | X   | X   |     |
| voc24 | Acids             | X   | X   | X   | X   |     | X   |     | X   | X   |
| voc25 | Others            | X   | X   | X   | X   | X   | X   | X   | X   | X   |

Table S3: Altitude of the 25 levels (center of the altitude level) in CAMS-GLOB-AIR, the emissions from aircraft.

| Altitude level | Altitude (km) |
|----------------|---------------|
| 1              | 0.305         |
| 2              | 0.915         |
| 3              | 1.525         |
| 4              | 2.135         |
| 5              | 2.745         |
| 6              | 3.355         |
| 7              | 3.965         |
| 8              | 4.575         |
| 9              | 5.185         |
| 10             | 5.795         |
| 11             | 6.405         |
| 12             | 7.015         |
| 13             | 7.625         |
| 14             | 8.235         |
| 15             | 8.845         |
| 16             | 9.455         |
| 17             | 10.065        |
| 18             | 10.675        |
| 19             | 11.285        |
| 20             | 11.895        |
| 21             | 12.505        |
| 22             | 13.115        |
| 23             | 13.725        |
| 24             | 14.335        |
| 25             | 14.945        |

10 Table S4: This table indicates the global totals for 2 groups of sectors, transportation (sum of road and non-road transportation) and energy + industrial activities (sum of the sectors called power generation, refineries, industrial processes, fugitive and solvents) for the years 2000, 2012 and 2021, as well as the 2000-2012 and 2012-2021 changes.

|                        | Transportation |       |       |                  |                  | Energy/industrial |        |        |                  |                  |
|------------------------|----------------|-------|-------|------------------|------------------|-------------------|--------|--------|------------------|------------------|
|                        | 2000           | 2012  | 2021  | Change 2012-2000 | Change 2021-2012 | 2000              | 2012   | 2021   | Change 2012-2000 | Change 2021-2012 |
| CO <sub>2</sub> (excl) | 5,480          | 6,559 | 7,157 | +20%             | +9%              | 16,525            | 24,561 | 25,370 | +49%             | +3%              |
| CH <sub>4</sub>        | 0.75           | 0.89  | 1.1   | +19%             | +21%             | 83.8              | 113.3  | 122.4  | +35%             | +8%              |
| CO                     | 265.5          | 186.2 | 169.1 | -30%             | -10%             | 70.6              | 114.9  | 113.1  | +63%             | -2%              |
| NO <sub>x</sub>        | 39.2           | 35.9  | 32.4  | -9%              | -10%             | 27.3              | 36.1   | 33.3   | +32%             | -8%              |
| NMVOCS                 | 29.0           | 28.5  | 26.9  | -2%              | -6%              | 60.7              | 78.1   | 81.8   | +29%             | +5%              |
| SO <sub>2</sub>        | 14.9           | 11.1  | 3.2   | -26%             | -70%             | 25.8              | 40.6   | 32.9   | +57%             | -19%             |
| BC                     | 0.69           | 0.67  | 0.54  | -3%              | -20%             | 1.35              | 2.23   | 1.97   | +35%             | -12%             |
| OC                     | 9.9            | 10.0  | 10.6  | +1%              | +6%              | 11.8              | 11.6   | 11.3   | -2%              | -3%              |
| NH <sub>3</sub>        | 0.49           | 0.71  | 0.72  | +45%             | +1%              | 1.59              | 2.13   | 2.23   | +34%             | +5%              |
| Benzene                | 1.5            | 1.2   | 1.0   | 5.5              | 6.0              | 2.0               | 3.0    | 3.0    | +48%             | 0%               |

15

Table S5: This table indicates the global totals for 2 sectors of groups of sectors, residential and agriculture + waste (livestock, soils, waste burning and waste management) for the years 2000, 2012 and 2021, as well as the 2000-2012 and 2012-2021 changes.

|                        | Residential |      |      |                  |                  | Agriculture + waste |      |      |                  |                  |
|------------------------|-------------|------|------|------------------|------------------|---------------------|------|------|------------------|------------------|
|                        | 2000        | 2012 | 2021 | Change 2012-2000 | Change 2021-2012 | 2000                | 2012 | 2021 | Change 2012-2000 | Change 2021-2012 |
| CO <sub>2</sub> (excl) | 3020        | 3230 | 3510 | +7%              | +9%              | 11.9                | 13.0 | 13.2 | +9%              | +1%              |
| CH <sub>4</sub>        | 12.2        | 12.8 | 13.0 | +5%              | +1.6%            | 204                 | 231  | 240  | +13%             | +4%              |
| CO                     | 158         | 168  | 167  | +6%              | -1%              | 37.1                | 50.8 | 56.5 | +37%             | +11%             |
| NO <sub>x</sub>        | 3.24        | 3.53 | 3.6  | +9%              | +2%              | 2.97                | 3.61 | 3.74 | +21%             | +4%              |
| NMVOCS                 | 22.6        | 24.3 | 24.3 | +7%              | 0%               | 9.5                 | 11.9 | 12.7 | +25%             | +7%              |
| SO <sub>2</sub>        | 7.0         | 6.7  | 6.2  | -4%              | -7%              | 0.28                | 0.36 | 0.38 | +28%             | +5%              |
| BC                     | 1.49        | 1.54 | 1.59 | +3%              | +3%              | 0.27                | 0.36 | 0.39 | +38%             | +8%              |
| OC                     | 6.09        | 6.21 | 6.12 | +2%              | -2%              | 1.86                | 2.49 | 2.65 | +34%             | +6%              |
| NH <sub>3</sub>        | 3.40        | 3.72 | 3.88 | +9%              | +4%              | 35.4                | 42.2 | 42.7 | +19%             | +1%              |
| Benzene                | 0.93        | 1.02 | .90  | +10%             | -12%             | 0.56                | 0.70 | 0.69 | +25%             | -2%              |

20

## Supplement Figures

25

Figure S1: Changes in the CAMS-GLOB-ANT\_v5.3 emissions of CO, NO<sub>x</sub>, NMVOCs and SO<sub>2</sub> for the 2000-2023 period in Western Europe. In order to show the emissions for all sectors, a logarithmic scale is used.

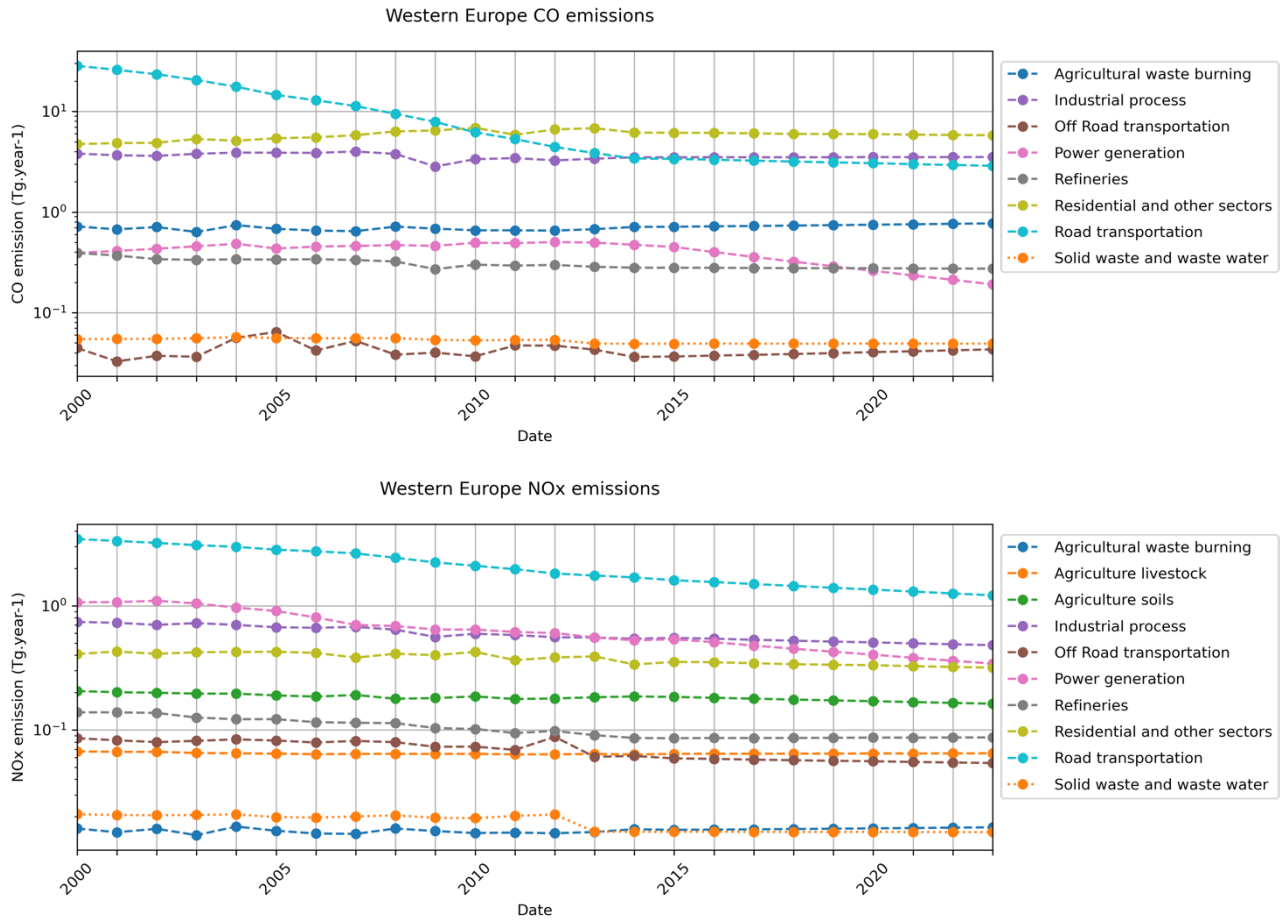

30

Western Europe SO2 emissions

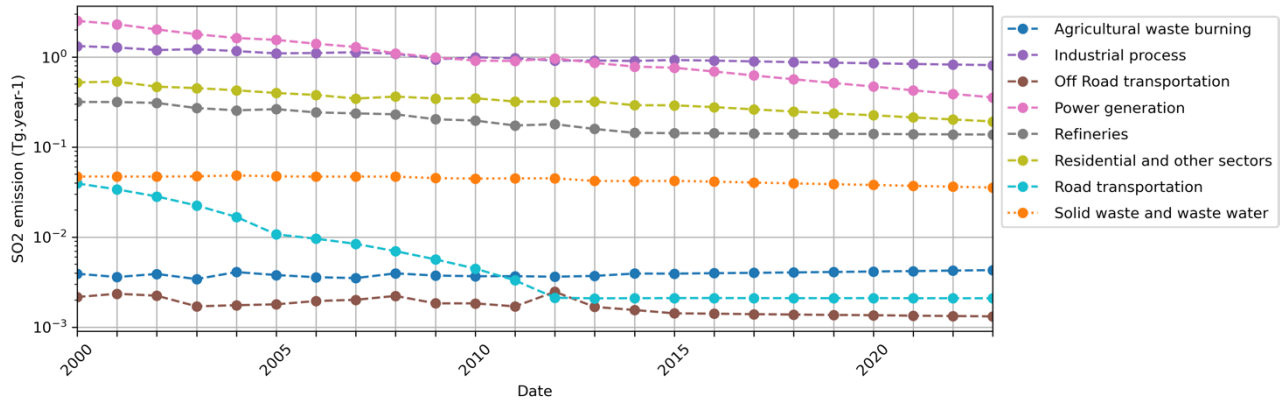

Western Europe NMVOCs emissions

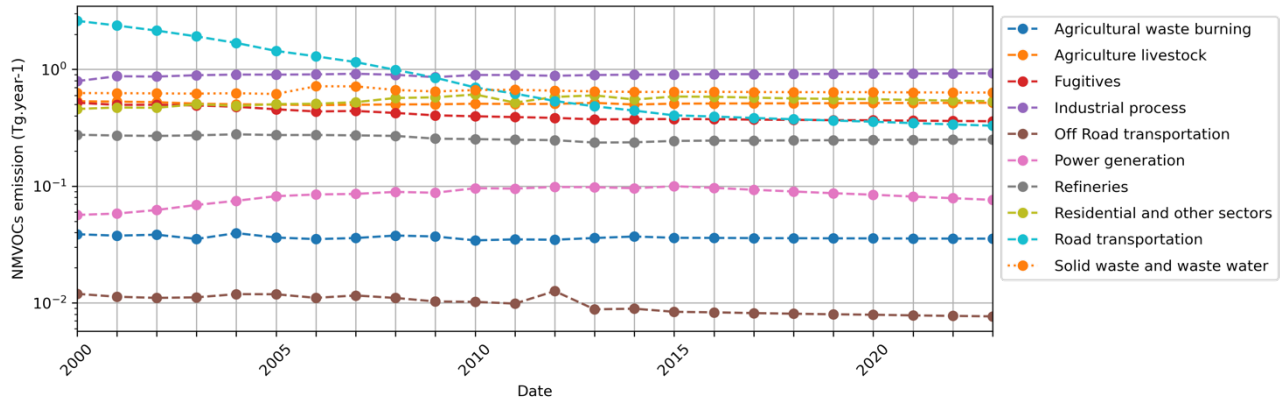

35

40



Figure S2: changes in the CAMS-GLOB-ANT\_v5.3 emissions of CO, NO<sub>x</sub>, NMVOCs and SO<sub>2</sub> for the 2000-2023 period in Central Europe. In order to show the emissions for all sectors, a logarithmic scale is used.

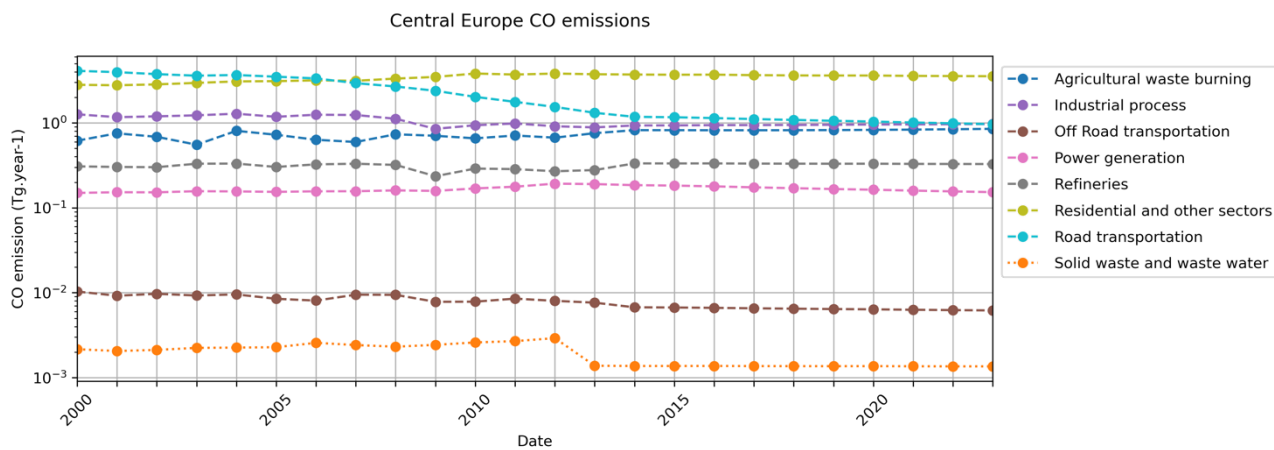

45

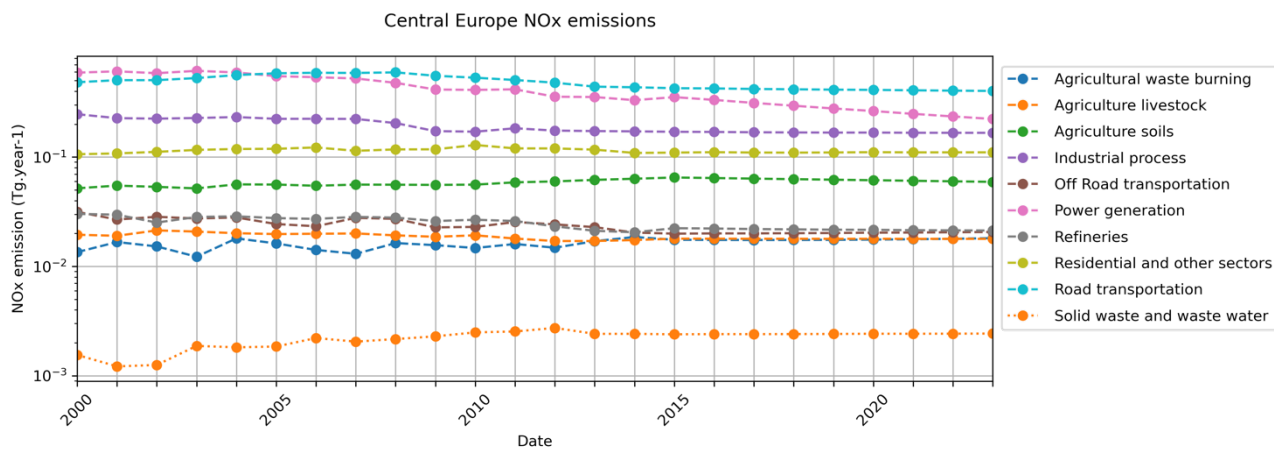

Central Europe NMVOCs emissions

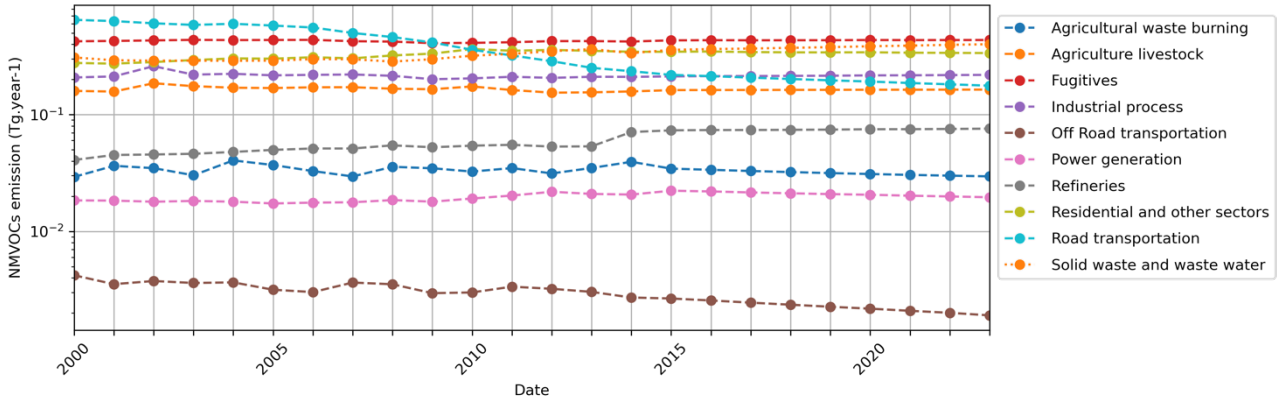

Central Europe SO2 emissions

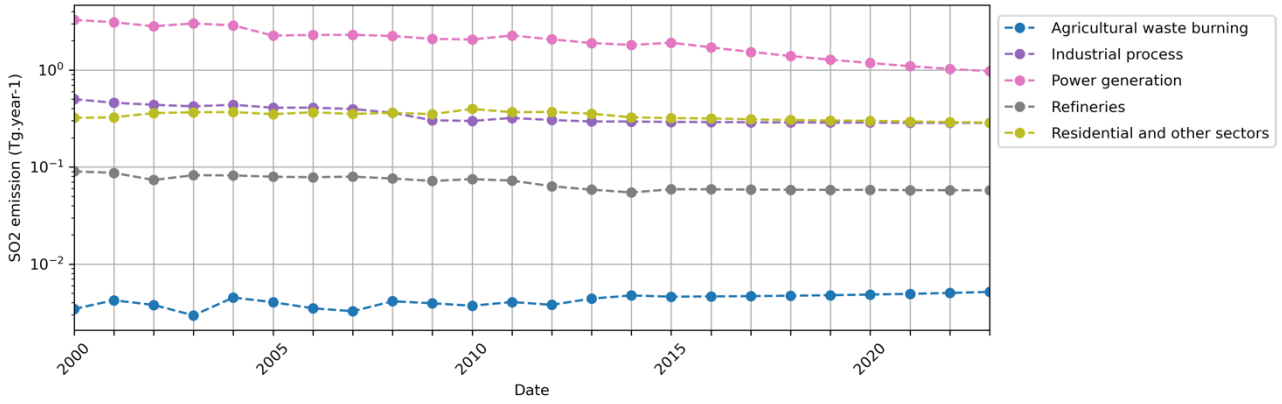

Figure S3: Comparisons of the CAMS-GLOB-ANT\_v5.3 emissions with other global datasets and the CAMS-REG\_V5.1 inventory for Central Europe.

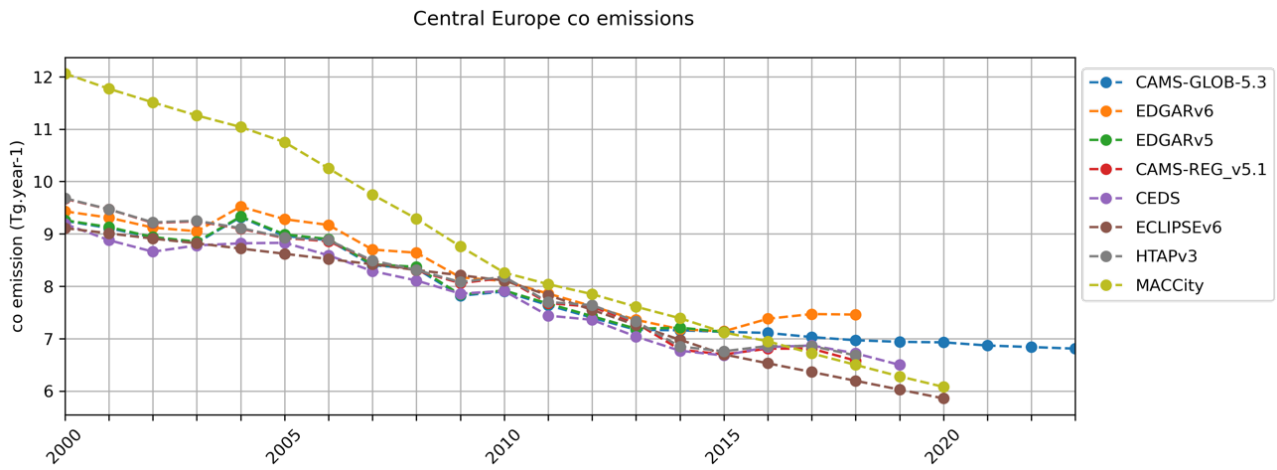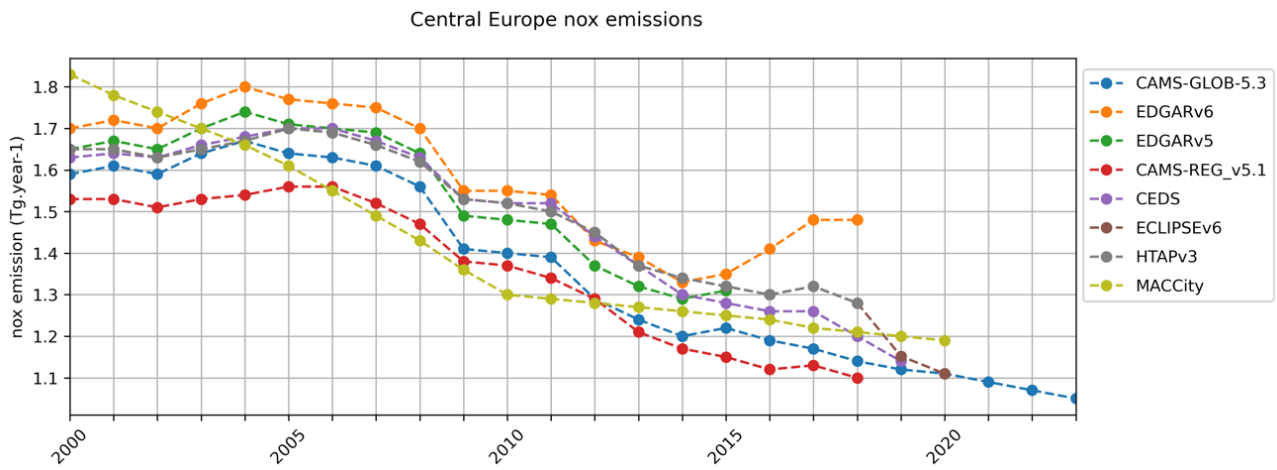

Central Europe vocs emissions

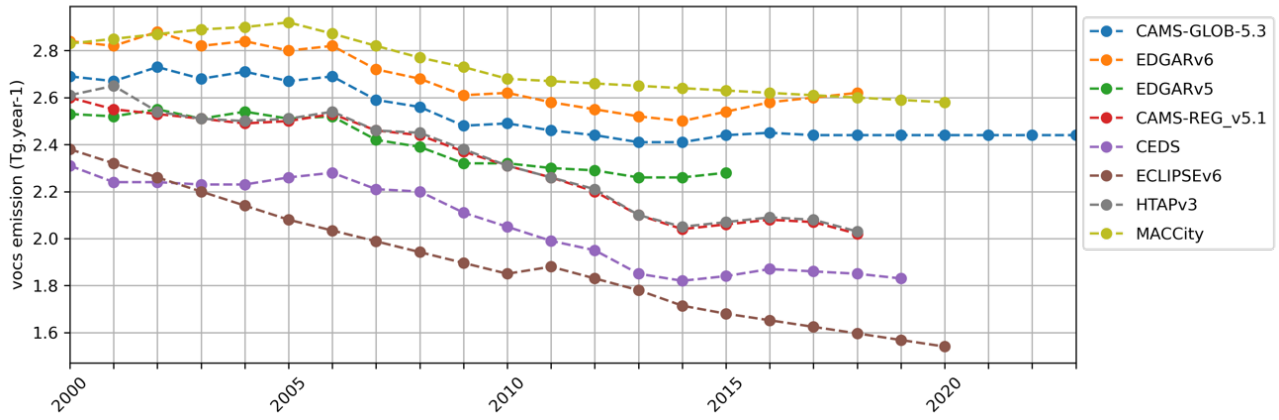

65

Central Europe so2 emissions

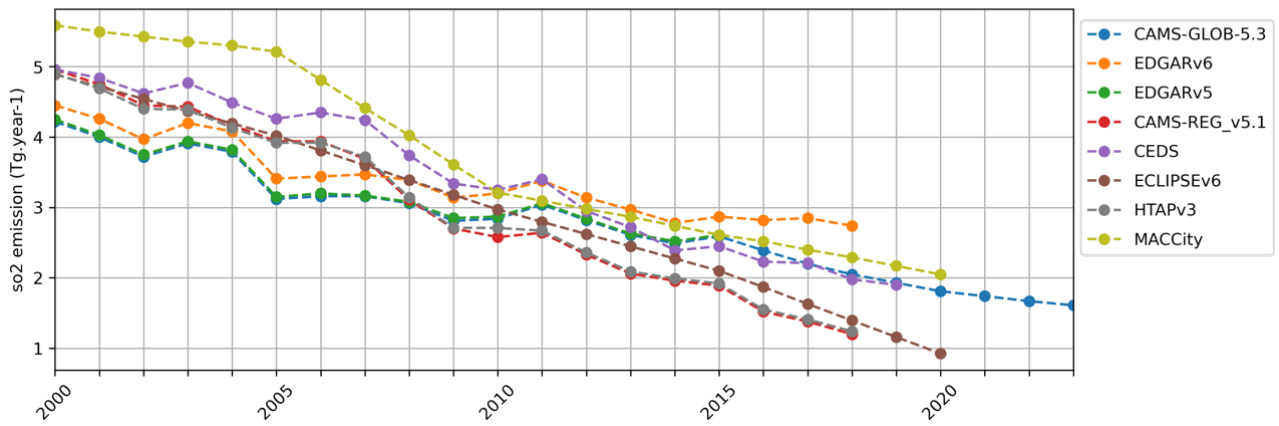

70

Figure S4: changes in the CAMS-GLOB-ANT\_v5.3 emissions of CO, NO<sub>x</sub>, NMVOCs and SO<sub>2</sub> for the 2000-2023 period in the USA. In order to show the emissions for all sectors, a logarithmic scale is used.

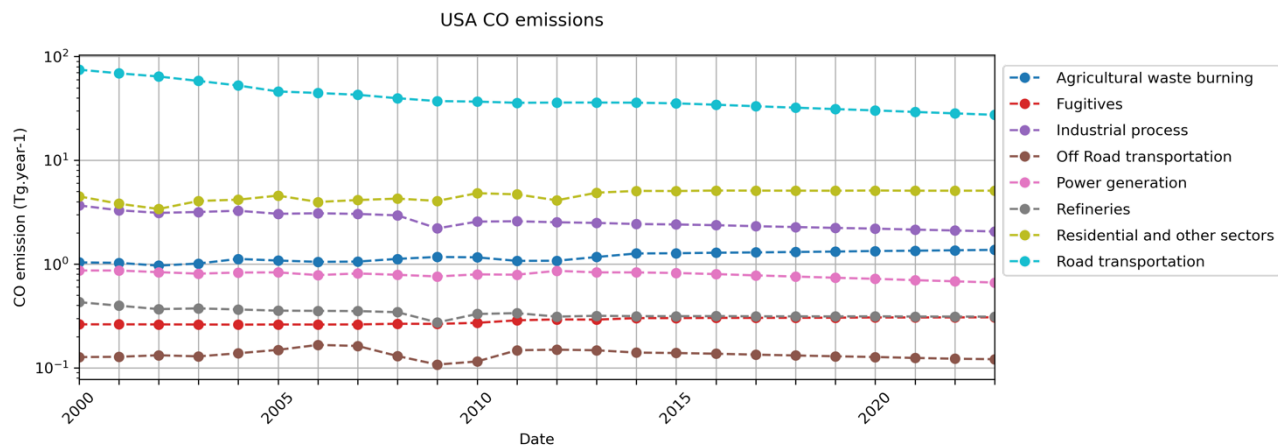

75

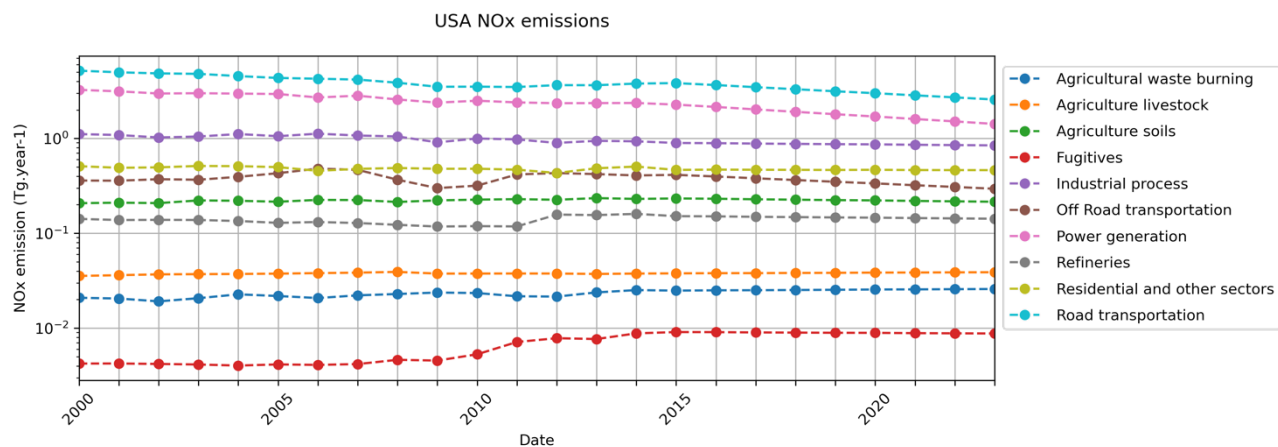

USA NMVOCs emissions

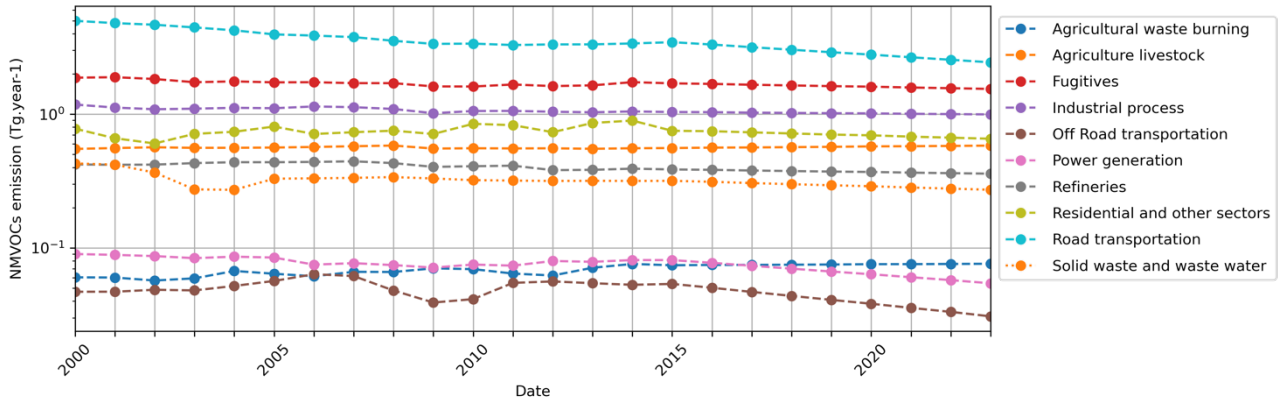

USA SO2 emissions

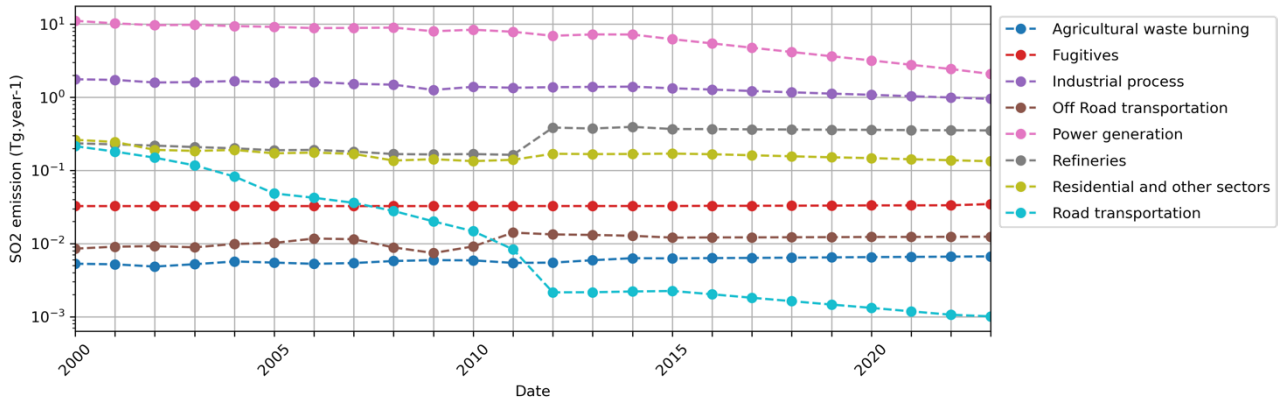

80

85

Figure S5: changes in the CAMS-GLOB-ANT\_v5.3 emissions of CO, NO<sub>x</sub>, NMVOCs and SO<sub>2</sub> for the 2000-2023 period in China. In order to show the emissions for all sectors, a logarithmic scale is used.

90

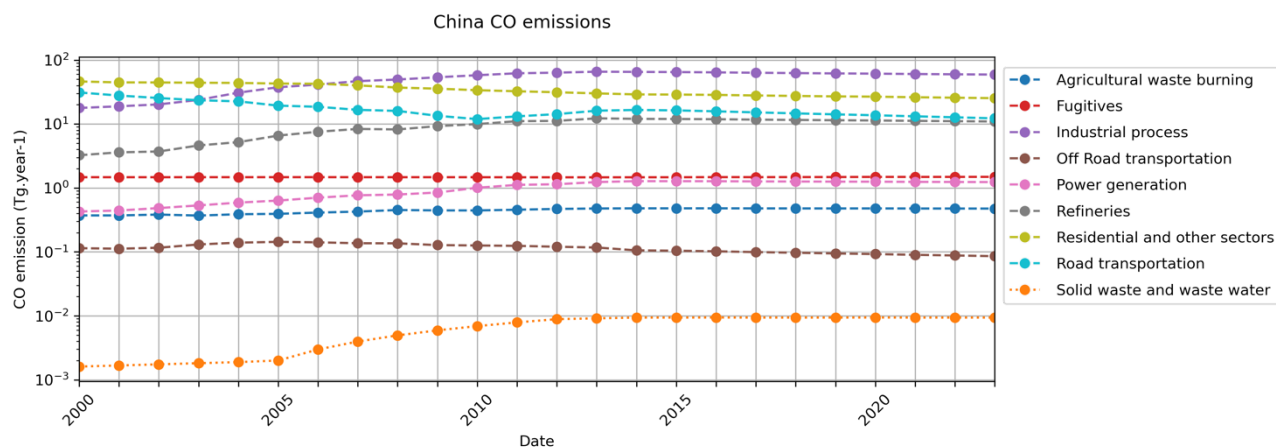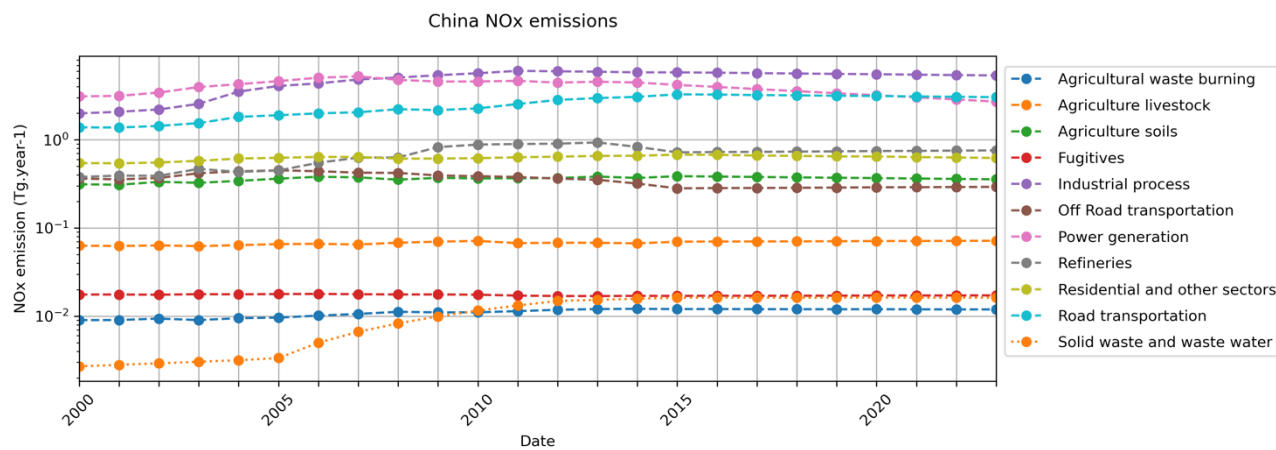

95

China NMVOCs emissions

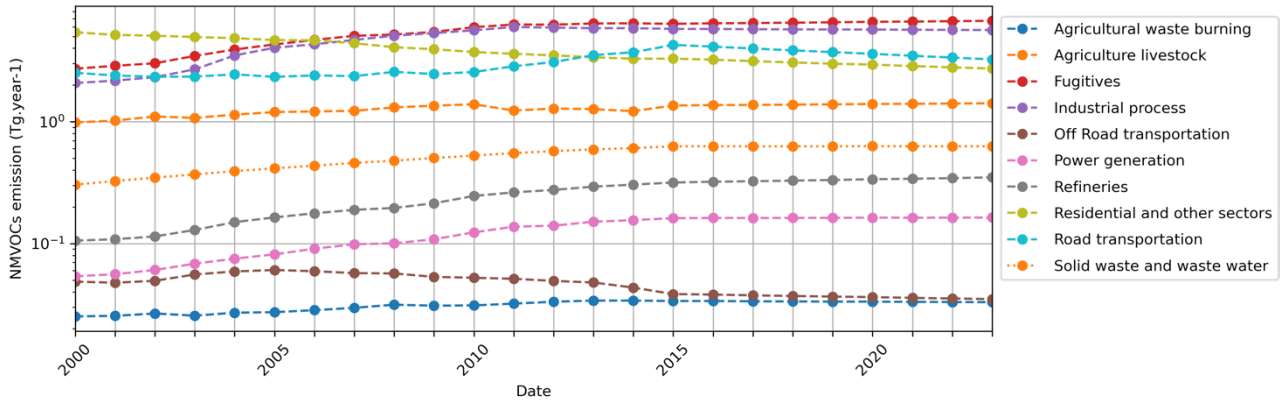

China SO2 emissions

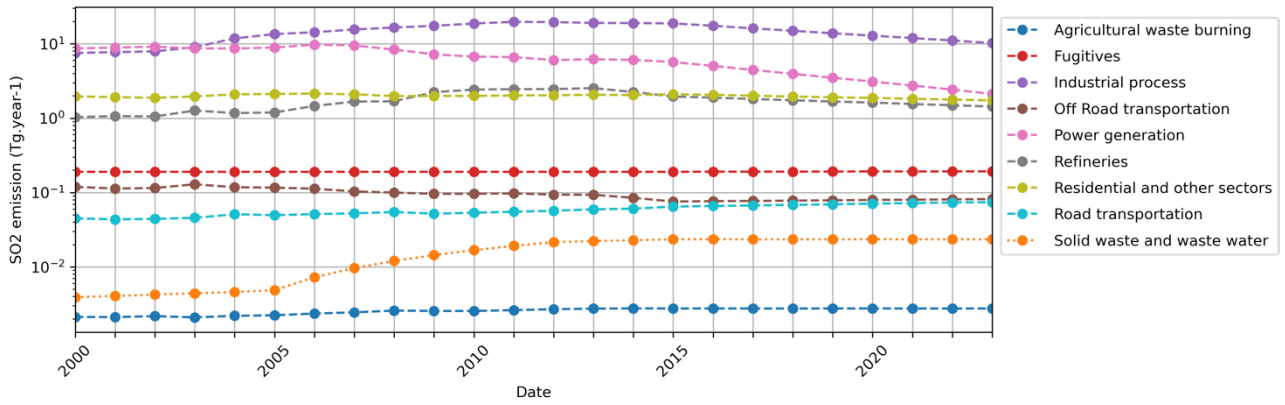



Figure S6: changes in the CAMS-GLOB-ANT\_v5.3 emissions of CO, NO<sub>x</sub>, NMVOCs and SO<sub>2</sub> for the  
 105 2000-2023 period in India. In order to show the emissions for all sectors, a logarithmic scale is used.

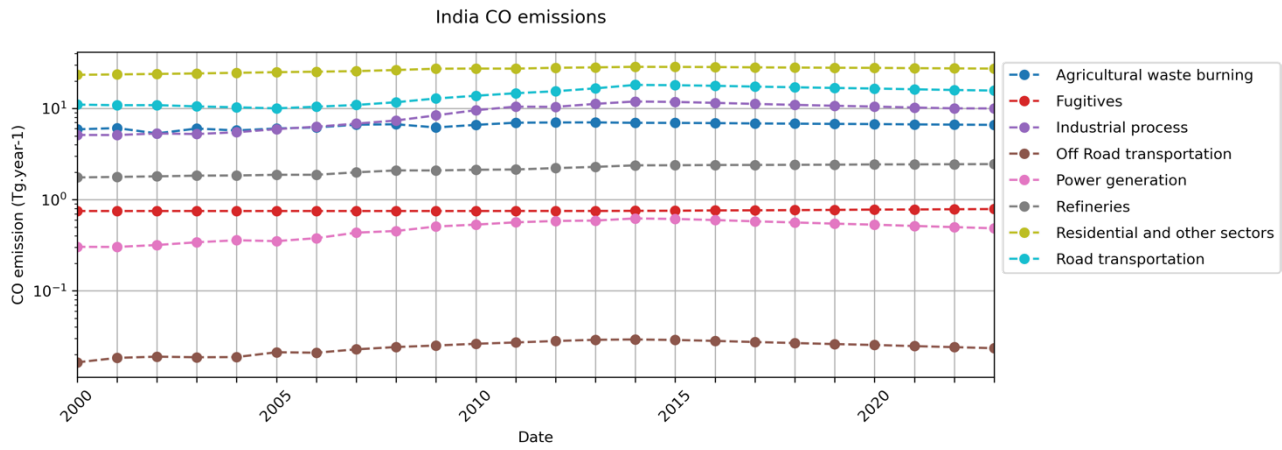

110

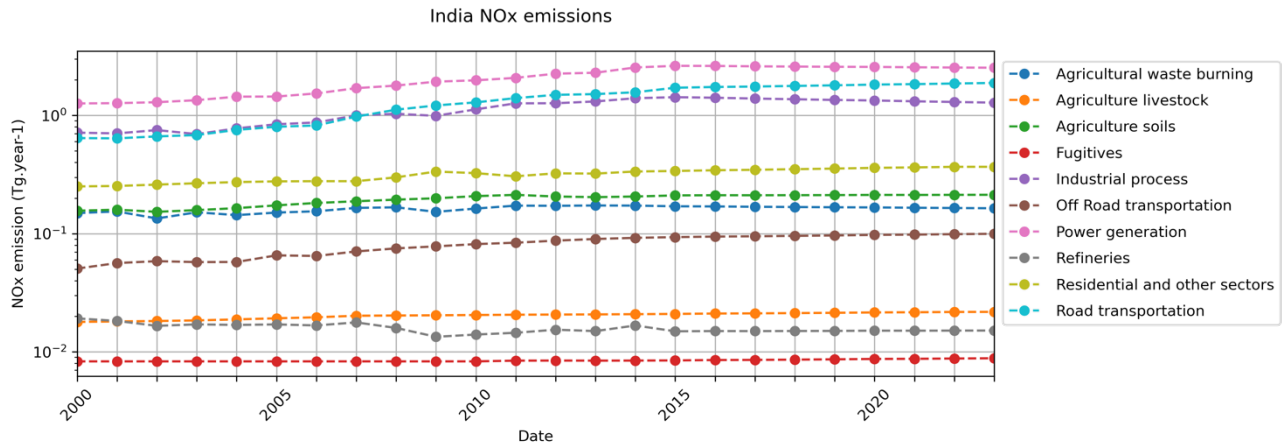

India NMVOCs emissions

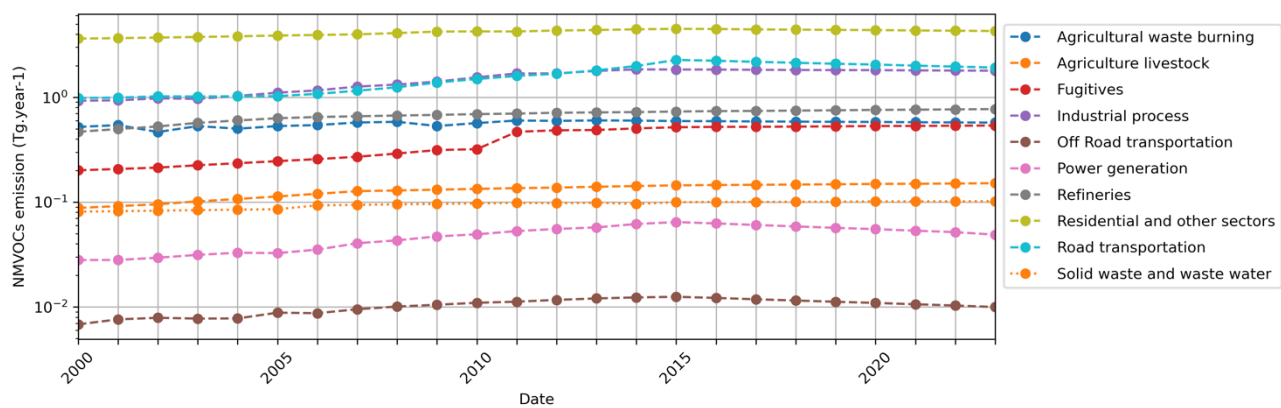

115

India SO2 emissions

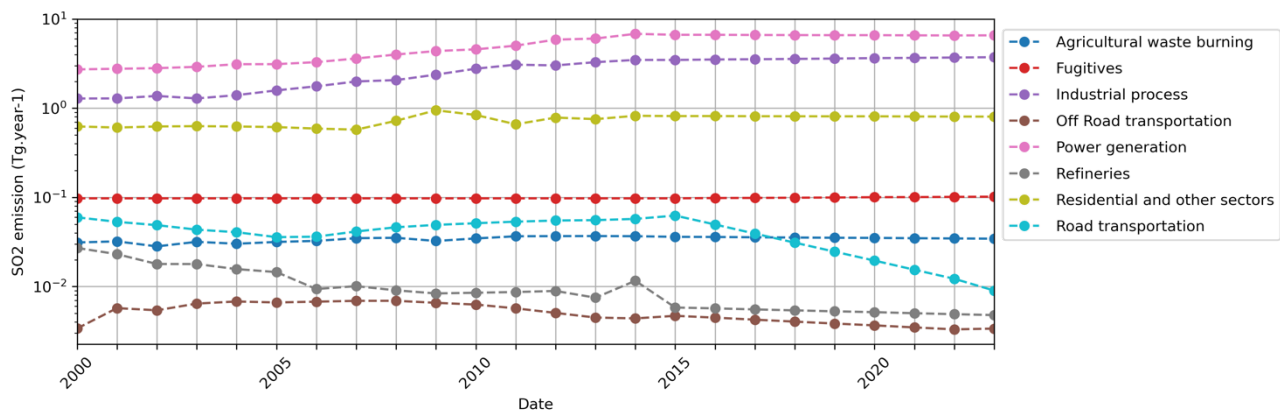

Supplement: Supplementary file 1 [file essd-2023-306-supplement.pdf]
