# Supplementary material for: Global Anthropogenic Emissions (CAMS-GLOB-ANT) for the Copernicus Atmosphere Monitoring Service Simulations of Air Quality Forecasts and Reanalyses
Source: Copernicus journal article supplement (doi:10.5194/essd-2023-306), 2023-08-31
Supplement: Supplementary file [file essd-2023-306-AC2-supplement.pdf]

## ESSD 2023-306 – Answers to reviewer 2:

We thank the reviewer for his/her comments. We have taken into account all the comments of the reviewer and improved the description of the dataset.

Answers to the annotated PDF: Note that the lines indicated in the answer correspond to the annotated PDF provided by the reviewer

- Line 23: “agriculture” has been replaced by “agricultural”
- Line 26: the words “emitted at the surface” have been removed, as the paper also describes the vertical distribution of the emissions from aircraft.
- Line 32: a sentence has been added concerning the analysis of the emissions data, i.e. : “Depending on the species and regions, good agreements as well as significant differences are highlighted, which can be further explained through an analysis for different sectors as shown in the figures in the supplement.”
- Line 36: the word “surface” has been removed, to account for the fact that the paper also describes the emissions from aircraft
- Line 38: the words “at the surface of the Earth” have been removed and the word “generated” has been replaced by “emitted”
- Line 44: as several references are detailed in Section 2, we have changed the words “as presented in Section 2” by “as detailed in Section 2. The words “surface inventories” have been replaced by “emission inventories”.
- Line 58: the word “gaseous” has been added
- Line 57: the words “with constant updates” which are too vague have been removed.
- Line 59: the sentence has been replaced by “None of the currently publicly available inventories such as the ones described in Section 2 and in Granier et al. (2023) provide the emissions required by the CAMS modeling system”.
- Line 60: in order to indicate the period required for the CAMS reanalysis, we have indicated in line 54 that the CAMS reanalysis starts in year 2003. In line 60, we have also replaced “CAMS modeling system” by “CAMS forecasts and reanalysis”. We added “for the reanalysis” after the words “too short period”.
- Line 63: we have changed the words “for the most recent years” into “for real-time forecasts”

- Line 63: we have changed “by the models” into “by the CAMS and other chemistry-climate models”, as the CAMS emissions are currently used by several other global and regional models.
- Line 69: as also mentioned by Reviewer 1, these sentences section have been deleted. They explain why some species are not considered in the dataset, and are not really meaningful in the paper.
- Line 79: we have indicated that the version of the emissions described in the paper is version 5. We will only indicate that this is version 5.3 of the dataset in the access to the data. As an information to the reviewer and also mentioned in the metadata in the ECCAD database, versions 5.1 and 5.2 use former version of the ship emissions.
- Line 94: in order to indicate that we have used the gridded emissions from EDGAR version 5, the word “gridded” has been added in line 93. We have also removed the words “national totals” in line 94, as well as the mention to the emissions of PMs.
- Line 107: when the development of the CAMS emissions started, the CEDS were only available at a 0.5x0.5 degree resolution. This is why we have used the CEDS emissions at that resolution.
- Line 114: the CAMS-GLOB-SHIP emissions are based on near-real-time data, using the AIS (Automatic Identification System) data: with AIS information, the exact location of ships is known, together with many more and accurate information than in the CEDS ship emissions.
- Line 121: the back casting of the ship emissions before AIS data were available is based on many different data, which would be too long to detail in the paper. Information can be for example found in the 2<sup>nd</sup> IMO greenhouse gas study (<https://www.imo.org/en/OurWork/Environment/Pages/Second-IMO-GHG-Study-2009.aspx>).  
 For example, the percentage change per year that was used for the size of ships is the following: Ropax vessels: 1.25%/yr; RoRos, Vehicle carriers: 1.25%/yr; General cargo ships, Bulk cargo ships: 0.4%/yr; Containerships, refrigerated cargo ships: 1.2%/yr; Chemical tankers, Crude oil tankers, LPG tankers, Oil Product tankers: 2%/yr; Small passenger ships, Ferryboats, high speed craft: 0.3%/yr; Cruise ships: 0.3%/yr; Fishing vessels: 0.3%/yr; Other ship classes: 0% /year  
 For the fuel consumption changes, the following percentages were used: Ropax vessels: -2.2%/yr; RoRos, Vehicle carriers: -2.2%/yr; General cargo ships, Bulk cargo ships: -1.7%/yr; Containerships, refrigerated cargo ships: -2.2%/yr; Chemical tankers, Crude oil tankers, LPG tankers, Oil Product tankers: -1.9%/yr; Other ship classes: -1.3% /year  
 If requested by the reviewer, these values could be put in a table in the supplement of the paper, though the focus of the paper is not on ship emissions.

We have rewritten the current sentence in the paper as: “The earlier years, 2000-2013, have been back casted based on 2016 activity data and using scaling factors taking into

account for fleet size growth, the lower energy efficiency and smaller ship size in previous years”

- Line 130: a reference has been added for the ECAs zone, from the International Maritime Organization, which is: “as defined by the International Maritime Organization ([https://www.imo.org/en/OurWork/Environment/Pages/Emission-Control-Areas-\(ECAs\)-designated-under-regulation-13-of-MARPOL-Annex-VI-\(NOx-emission-control\).aspx](https://www.imo.org/en/OurWork/Environment/Pages/Emission-Control-Areas-(ECAs)-designated-under-regulation-13-of-MARPOL-Annex-VI-(NOx-emission-control).aspx), last access December 2023)”  
The sentence has been rewritten as: “A global Sulphur cap (limit on the sulphur content in the fuel oil used on board ships) became effective in Jan 1<sup>st</sup> 2020, which decreased SO<sub>x</sub> and PM emissions, but the ECAs regions, which implement those rules several years before 2020 were unaffected by the cap” to make clearer that some regions implemented a sulfur cap before the rule was mandatory at the global scale.
- Lines 133-134: these lines have been removed
- Line 137: the sentence has been modified and the mentioned daily and weekly temporal profiles have been removed. The sentence is now: “the monthly temporal profiles used in CAMS-GLOB-ANT are available on the ECCAD database”
- Line 143: the CAMS-GLOB-TEMPO temporal profiles are used, as they are based on more recent data than used in the EDGAR temporal profiles. Furthermore, the CAMS-GLOB-TEMPO account for meteorological conditions and sociodemographic factors, which is not the case for the EDGAR temporal profiles.
- Line 155: as indicated in the paper, the CAMS-GLOB-ANT emissions cover the 2000-2023 period, so no temporal profiles before 2000 have to be taken into account.
- Line 159: as mentioned above, we now use only the terminology version 5 for the CAMS-GLOB-ANT emissions, to avoid confusion.
- Line 160: there are 35 species in the dataset, 10 main species and 25 speciated VOCs. The difference between the two CO<sub>2</sub> species is now better explained with “CO<sub>2</sub> (divided into short organic cycle (released by combusting biofuels, agricultural waste burning or field burning) and excluding the short cycle)”.
- Line 162 and line 164: the sentence referring to the EDGAR sectors has been modified and is now: “The sectors used in CAMS-GLOB-ANT are detailed in Table S1, and the corresponding sectors in the EDGARv5 and CEDS inventories are shown as well in this table”.
- Line 164: the reference to the 2000-2023 period has been removed, as it is explained in other parts of the paper.
- Line 174: as mentioned above, the CEDS emissions at 0.1x0.1 degree were available after the CAMS-GLOB-ANT emissions were developed. Therefore, we chose to use the

EDGAR emissions as a basis for the CAMS-GLOB-ANT inventory. We have also better specified that the emissions are needed until the end of the year 2023, so that they can be used for global forecasts.

- Line 184: we have now specified that we are calculating the relative change in the emissions for each of the three periods, 2013-2019, 2014-2019 and 2015-2019, in order to determine which data will be used as a basis for the extrapolation.
- Line 191: we have now better indicated below the equation that  $t_f$  and  $t_i$  are 2019 and 2014, respectively
- Line 195: the word “correspondent” has been replaced by the word “equivalent”
- Line 198, the acronym of the sector was not very clear. The sentence has been changed to: “For the sector “road transportation with resuspension” the same growth factor as for the road transportation sector is used.”
- Line 208: the quantity we call “growth factor” which is use for the extrapolation of the emissions is based only on the CEDS emissions. It assumes that the CEDS emissions have been validated with model or satellite studies.
- The aircraft emissions were developed before version 5 of CAMS-GLOB-ANT emissions were developed. Even if aircraft emissions from CEDS are now available, they are not mentioned in the McDuffie et al. (2020) and the O’Rourke (2021) articles and dataset. We have rephrased the text as: “We have developed the aircraft emissions on the basis of the CEDS aircraft emission data described in Hoesly et al. (2018).”, so that the users know that we used the data from this Hoesly et al. paper.
- Line 218: we have removed the sentence “These dates were chosen because the trends are stable after 2011, except for the year 2020, as indicated in Section 4”, as it could be confusing to the reader.
- Line 220: as indicated in the paper, the emissions after 2019 (or 2014 for aircraft) are all based on extrapolations, using the “growth factors” determined in section 3.2. Therefore, the extrapolation is done for the full year 2023, even if no information is yet available on activity data for the past 3-4 years.
- Line 223: the speciation used for the aircraft emissions is based on the paper used for the speciation of the surface VOCs emissions. This choice was done for consistency on the categories of the speciated VOCs. The corresponding sentences are now: “To be consistent with the VOCs speciation of the surface anthropogenic emissions, the emissions of speciated VOCs emissions from aircraft in CAMS-GLOB-AIR are based on the speciation described by Huang et al. (2017) for different emission sectors. We calculated the ratios of the emissions of each individual VOCs to the total NMVOCs species for each of these two altitude levels (landing/taking off and cruise altitudes) in the EDGAR dataset, at a 0.1x0.1 degree horizontal resolution.”

- Line 230: Table S2 has been changed to Table S3
- Line 235: “the most recent years” has been changed to 2023
- Line 237: the references to versions 5.1 and 5.2 of the emissions have been removed, in order to avoid confusion with obsolete versions.
- Line 244: “in” has been replaced by “by”.
- Line 249: the list of species has been removed, as it is given earlier.
- Line 264: the following words have been added at the end of the sentence: “these changes depend strongly on the regions and sectors, as discussed further in the following sections”.
- Line 267: we have added the words: “and four groups of sectors” as proposed.
- Line 268: we have changed the years in Table S4 and S5 to 2023 instead of 2021 and we have reported the numbers for 2023 in these tables.
- Line 307: the word “ammonia” is not used anymore, NH<sub>3</sub> is used everywhere
- Line 335: the space has been added
- Line 346: the word “changer” has been removed
- Line 361: we have changed the sentence concerning the CH<sub>4</sub> emissions in the USA to: “The stability in the CH<sub>4</sub> emissions is related to constant oil and gas operations, as well as from livestock agriculture practices (fugitive and manure/enteric fermentation emissions in the EDGAR emissions).
- Line 365: as a reference, we added the following words: “these standards are described in details in the website of the US EPA (Environmental Protection Agency, <https://www.epa.gov/air-emissions-inventories>, last access: December 2023).”
- Line 389: some numbers have been added and the sentence is now: “From 2000 to 2012, the emissions of all species (except NH<sub>3</sub>) increased by 20% to 50% for most pollutants, and even 90% for NO<sub>x</sub>.”
- Line 415: two references giving information on the emissions reduction plans implemented in the 2010s have been added, Kurokawa and Ohara, ACP, 2020 (already cited in the paper) and Zheng et al., ACP, 2018.

- Line 435: the decrease in the emissions of CO in India after 2015 is shown in the CEDS emissions dataset, and one reference has been added, i.e. Joshi et al, Chemosphere, 2023.
- Lines 451 and 452: the spelling mistakes and subscript have been corrected.
- Line 480: the CAMS-GLOB-AIR dataset is described in section 3.3. The reason why the acronym of this dataset is not CAMS-GLOB-ANT is due to the fact that the aircraft emissions are given as 3-dimensional fields. In the ECCAD database, we could not keep the same acronym for 2-D and 3-D fields.
- Line 485: the word “short-cycle” has been replaced by “short organic cycle” to be consistent with the rest of the paper.
- Line 486: the word “hydrocarbons” has been replaced by “volatile organic compounds” for consistency with the rest of the paper.
- Line 629: the unit of the global and regional (Tg/yr) totals have been added in the table captions.
- Line 699: the figure has been replaced by a new figure with larger fonts
- Line 703: the units are Tg/yr as indicated in the figure caption, but they don't represent the emissions of a specific com
- Line 709: the growth factors are defined in section 3.2, and this section includes Figure 5.
- Line 719: the answer is the same as the answer to line 220: “as indicated in the paper, the emissions after 2019 (or 2014 for aircraft) are all based on extrapolations, using the “growth factors” determined in section 3.2. Therefore, the extrapolation is done for the full year 2023, even if no information is yet available on activity data for the past 3-4 years.”
