# Supplementary material for: Global Anthropogenic Emissions (CAMS-GLOB-ANT) for the Copernicus Atmosphere Monitoring Service Simulations of Air Quality Forecasts and Reanalyses
Source: Copernicus journal article supplement (doi:10.5194/essd-2023-306), 2023-08-31
Supplement: Supplementary file [file essd-2023-306-RC1-supplement.pdf]

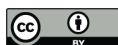

# Global Anthropogenic Emissions (CAMS-GLOB-ANT) for the Copernicus Atmosphere Monitoring Service Simulations of Air Quality Forecasts and Reanalyses

5

Antonin Soulie<sup>1</sup>, Claire Granier<sup>1,2,3</sup>, Sabine Darras<sup>4,7</sup>, Nicolas Zilbermann<sup>4</sup>, Thierno Doumbia<sup>1</sup>, Marc Guevara<sup>5</sup>, Jukka-Pekka Jalkanen<sup>6</sup>, Sekou Keita<sup>1</sup>, Cathy Liousse<sup>1</sup>, Monica Crippa<sup>7,8</sup>, Diego Guizzardi<sup>7</sup>, Rachel Hoesly<sup>9</sup>, Steven J. Smith<sup>9</sup>

10 <sup>1</sup>Laboratoire d'Aérodologie, Université de Toulouse, CNRS, UPS, Toulouse, France

<sup>2</sup>NOAA Chemical Sciences Laboratory, Boulder, Colorado, USA

<sup>3</sup>CIRES, University of Colorado Boulder, Boulder, Colorado, USA

<sup>4</sup>Observatoire Midi-Pyrénées, Toulouse, France

<sup>5</sup>Barcelona Supercomputing Center, Barcelona, Spain

15 <sup>6</sup>Department of Atmospheric Composition Research, Finnish Meteorological Institute, Helsinki, Finland

<sup>7</sup>Joint Research Center, Ispra, Italy

<sup>8</sup>Unisystem S.A., Milan, Italy

<sup>9</sup>Joint Global Change Research Institute, Pacific Northwest National Laboratory, College Park, MD, USA

20 *Correspondence to:* Antonin Soulie (Antonin.soulie@aero.obs-mip.fr)

## Abstract.

Anthropogenic emissions are the result of many different activities, related to transportation, power generation, industrial, residential and commercial activities, waste treatment and agriculture practices. Air quality models are used to forecast the atmospheric composition, analyse observations and reconstruct the chemical composition of the atmosphere during the previous decades. In order to drive these models, gridded emissions of all compounds emitted at the surface need to be provided. This paper describes a new global inventory of emissions called CAMS-GLOB-ANT, developed as part of the Copernicus Atmosphere Monitoring Service (CAMS). The inventory provides monthly averages of the global emissions of 36 compounds, including the main air pollutants and greenhouse gases, at a spatial resolution

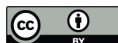

30 of 0.1x0.1 degree in latitude and longitude, for 17 emission sectors. The methodology to generate the emissions for the 2000-2023 period is explained, and the datasets are analysed and compared with publicly available global and regional inventories for selected world regions.

## 1. Introduction

The design of mitigation policies for both pollutants and greenhouse gases, and a verification of the efficiency of these policies rely on chemistry-climate and chemistry-transport models. In order to provide accurate results, these models require a good knowledge of the surface emissions inventories of many atmospheric compounds. These inventories provide the necessary information to calculate the concentrations of atmospheric species generated at the surface of the Earth from natural and anthropogenic processes: these species can then be affected by chemical transformations and transport processes, and lead to the formation of other chemical species. An accurate knowledge of the spatial and temporal distribution of primary emissions is therefore essential to quantify the impact of surface emissions on the distribution of atmospheric pollutants and greenhouse gases.

45 During the past decades, many surface inventories have been developed at the global and regional scales, as presented in Section 2. In general, surface emissions are calculated as the product of activity rates, emission factors and other factors depending on the type of source. Such data, for example activity rates, take a long time to collect, and the development of inventories is also a time-consuming effort. Therefore, most inventories do not provide emissions for the most recent years.

50 As part of Copernicus (<https://www.copernicus.eu>), the European Union's Earth observation program, the Copernicus Atmosphere Monitoring Service (CAMS: <https://atmosphere.copernicus.eu>) delivers near-real-time analyses on a daily basis and forecasts of the atmospheric composition at the global scale (Flemming et al., 2015). CAMS delivers as well a global reanalysis, which provides consistent multi-annual global datasets of atmospheric composition (Innes et al., 2019). The forecasts and reanalysis



55 provide three-dimensional fields of aerosols, chemical species and greenhouse gases. In order to provide these forecasts and reanalysis, the CAMS chemistry-transport models require up-to-date surface emissions with constant updates.

None of the currently available inventories provide the emissions required by the CAMS modeling  
60 system: either they cover a too short period, or they don't provide emissions for the most recent years, as required for global forecasts. Therefore, a new dataset called CAMS-GLOB-ANT has been developed during the past few years, which includes the emissions for air pollutants and greenhouse gases for the most recent years, at the spatial and temporal resolution required by the models. This paper describes the existing datasets (Section 2) used in the methodology to develop CAMS-GLOB-ANT (Section 3), the  
65 comparison of the dataset with other inventories (Section 4) together with information on studies done using the CAMS-GLOB-ANT dataset. Section 5 includes information on how to get access to the dataset and make on-line evaluation of the emissions.

It should be noted that the emissions of  $PM_{10}$  and  $PM_{2.5}$  are not provided in the CAMS-GLOB-ANT  
70 dataset: the CAMS-GLOB-ANT version 5.3 emissions are already used in the CAMS models or other models such as MUSICA (Tang et al., 2023), CESM (Gaubert et al., 2021; Bouarar et al., 2021), IFS (Huijnen, 2022) where the mass concentrations of PMs are calculated within the models using the specific chemical and physical schemes included in each of these models: such models therefore just require the emissions of species such as  $SO_2$ ,  $NH_3$ , BC and OC.

75

## 2. Datasets used in the development of CAMS-GLOB-ANT

The version of the CAMS-GLOB-ANT global anthropogenic emissions described in this paper is version 5.3, which is based on the Emissions Database for Global Atmospheric Research (EDGAR, version 5),  
80 the emissions provided by the Community Emissions Data System (CEDS, version of April 2021), the



temporal profiles from the CAMS-GLOB-TEMPO dataset and the ship emissions from the CAMS-GLOB-SHIP dataset. Each of these inventories is described in the following paragraphs.

## 2.1 EDGAR emissions

EDGAR, the Emissions Database for Global Atmospheric Research (<https://edgar.jrc.ec.europa.eu/>, last  
85 access July 2023), is developed at the Joint Research Center (JRC) in Italy. EDGAR provides emissions  
as national totals and gridmaps at 0.1 x 0.1 degree resolution at the global level, with yearly and monthly  
averages. The emissions are calculated using a technology-based emission factor approach for the  
different countries, and for 27 different sectors: the list of the sectors included in EDGARv5 is shown in  
Table S1.

90 The methodology used for the EDGAR emissions is described in Crippa et al. (2018; 2021) and online  
at: <https://edgar.jrc.ec.europa.eu/methodology>. We have used here version 5 of EDGAR, which provides  
for the 1970-2015 period, emissions for greenhouse gases (CO<sub>2</sub>, CH<sub>4</sub> and N<sub>2</sub>O) as well as for air  
pollutants, i.e. CO, NO<sub>x</sub>, NMVOCs, NH<sub>3</sub>, SO<sub>2</sub>, BC, OC and particulate matter (PM<sub>2.5</sub> and PM<sub>10</sub>). The  
national totals and gridded emissions for the different years and sectors are publicly available at:  
95 [https://edgar.jrc.ec.europa.eu/dataset\\_ap50](https://edgar.jrc.ec.europa.eu/dataset_ap50) (last access, July 2023).

The emissions for 25 speciated volatile organic compounds are also provided by EDGAR up to the year  
2012 ([https://edgar.jrc.ec.europa.eu/dataset\\_ap432\\_VOC\\_spec](https://edgar.jrc.ec.europa.eu/dataset_ap432_VOC_spec); last access July 2023), following the  
methodology described in Huang et al. (2017).

## 100 2.2 CEDS emissions



CEDS, the Community Emissions Data System (<https://www.pnnl.gov/projects/ceds>, last access: July 2023) is developed at the Joint Global Research Institute in Maryland, USA. CEDS emissions are developed within an open-source framework that produces annual emission estimates for research and analysis. The methodology used to derive the global emissions is detailed in Hoesly et al. (2018) and in  
105 McDuffie et al. (2017).

We have used the version of CEDS from O'Rourke et al. (2021a) which provides global emissions at a 0.5x0.5 degree on a monthly basis for the following species: SO<sub>2</sub>, NO<sub>x</sub>, BC, OC, NH<sub>3</sub>, NMVOCs, CO, CO<sub>2</sub>, CH<sub>4</sub>, N<sub>2</sub>O. This dataset is available at: <https://doi.org/10.25584/PNNLDataHub/1779095> (last access, July 2023) We have used the country totals provided by the version of CEDS released in April  
110 2021. The country emissions are given for 57 sectors from 1750 to 2019 (O'Rourke et al., 2021b) are available at: <https://doi.org/10.5281/zenodo.4737769> (last access, July 2023). The sectors included in the CEDS emissions by country are given in Table S1.

### 2.3 CAMS-GLOB-SHIP emissions

For the ship emissions, we have used the CAMS-GLOB-SHIP, version 3.1, dataset. These emissions are  
115 generated by the Ship Traffic Emission Assessment Mode (STEAM3, Johansson, 2017), which uses global vessel activity from years 2014-2018, constructed from both terrestrial and satellite data from Automatic Identification System (AIS) transponders, where all vessels larger than 300 tons and all passenger ships report their position with a few second intervals. It should be noted that the coverage of inland shipping data may be poor, because the use and coverage of AIS in inland waterways is not yet  
120 mandatory.

The earlier years, 2000-2013, have been back casted based on 2016 activity data and using scaling factors for fleet size growth, energy efficiency improvements and ship size growth. These scaling factors are applied separately for various shipping segments.



Disruptions, like the global COVID19 pandemic are considered, because the underlying activity data is  
125 based on observed ship locations. Changes in environmental regulation of the shipping sector have been  
included at global and regional levels. These include the establishment of Emission Control Areas (ECAs)  
for SO<sub>x</sub> and NO<sub>x</sub> in the Baltic Sea, North Sea and North America as well as Chinese domestic ECAs and  
vessel type specific rules for ships operating in European seas. Global Sulphur cap (limit on the sulphur  
content in the fuel oil used on board ships) became effective in Jan 1<sup>st</sup> 2020, which decreased SO<sub>x</sub> and  
130 PM emissions, but ECAs were unaffected by the cap because ECAs have had similar rules in effect for  
several years, already. The CAMS-GLOB-SHIP emissions are provided for several chemical compounds,  
CO<sub>2</sub>, CO, NO<sub>x</sub>, NMVOCs, BC and OC, SO<sub>2</sub> and SO<sub>4</sub> as well as ash.

The CAMS-GLOB-SHIP emissions are available from the ECCAD (Emissions of atmospheric  
Compounds and Compilation of Ancillary Data) database, at <https://ecad-aeris-data.fr>.

#### 135 **2.4 CAMS-GLOB-TEMPO temporal profiles**

The CAMS-GLOB-ANT monthly variability is implemented using monthly averaged profiles from the  
CAMS-GLOB-TEMPO dataset, described in Guevara et al. (2021): the daily, weekly and monthly  
temporal profiles are available on the ECCAD database. These temporal profiles consider the primary  
atmospheric pollutants, NO<sub>x</sub>, SO<sub>2</sub>, NMVOCs, NH<sub>3</sub>, CO and the greenhouse gases CO<sub>2</sub> and CH<sub>4</sub>, for the  
140 following categories: energy, industry, road transportation, residential and agriculture (livestock, soil and  
agricultural waste burning), which have a direct correspondence with the sector classification considered  
in CAMS-GLOB-ANT (Table S1). For the sectors not considered in CAMS-GLOB-TEMPO, the  
EDGAR version 5 monthly profiles are used.

The temporal profiles are available at a 0.1x0.1 degree spatial resolution. These temporal profiles are based  
145 on statistical information linked to emission variability at national and regional levels, such as electricity  
production statistics or measured traffic counts. Parameterizations accounting for meteorological



150 conditions and sociodemographic factors are taken into account in the temporal profiles, including the use of a heating degree day approach. An example of the daily temporal weights for the residential sector are shown for Madrid (Spain) and Capetown (South Africa) from 2000 to 2020 in Figure 1. The reported seasonality illustrates the role of meteorological conditions on the temporal variation of the residential emissions. For instance, the three largest peaks computed for Madrid in February 2015, January 2017 and January 2019 coincides with the occurrence of three unusual cold spell and snowfall events that affected this region.

155 We have used the most recent version of CAMS-GLOB-TEMPO, i.e. version 3.1, which provides temporal profiles from 2000 to 2020. For all the years after 2020, the 2020 monthly temporal profiles have been used.

### 3. Methodology used for the development of CAMS-GLOB-ANT version 5

#### 3.1 Definition of the sectors

160 CAMS-GLOB-ANT version 5 provides anthropogenic emissions for 17 sectors and for 36 species: CO<sub>2</sub> (divided into short cycle and excluding the short cycle), CH<sub>4</sub>, N<sub>2</sub>O, NO<sub>x</sub>, NMVOCs, SO<sub>2</sub>, BC, OC, NH<sub>3</sub> and 25 speciated volatile organic compounds. The emissions are provided for the sectors indicated in Table S1, which corresponds sometimes to the grouping of EDGAR sectors. The dataset starts in 2000, as requested in the CAMS reanalysis which also starts in 2000.

165 In order to calculate the emissions for the full 2000-2023 period for these sectors, a harmonization and grouping of the sectors of the EDGARv5 and CEDS datasets was performed. The sectors used in CAMS-GLOB-ANT are detailed in Table S1, and the corresponding sectors in the EDGARv5 and CEDS inventories are shown in table S1. The sectors have been chosen, so that they represent the main anthropogenic activities corresponding to power generation, industrial activities, fuel operations, different



170 modes of transportation, residential, agriculture activities and waste management. They have also been  
chosen, so that they are compatible with the definition of the sectors of the European dataset CAMS-REG  
(Kuenen et al., 2022). The sectors considered for the emissions of each of the 25 speciated volatile organic  
compounds considered in the inventory are indicated in Table S2.

### 3.2 Extrapolation of the emissions to the most recent years

175 In order to obtain emissions that can be used in global forecasts and long-term reanalyses, it is necessary  
to extrapolate the emissions to the most recent years and months. The EDGARv5 emissions are available  
until the year 2015 and the CEDS emissions are available up to 2019. We have used EDGARv5 emissions  
as a basis for the CAMS emissions, as their spatial resolution is 0.1x0.1 degree, which is the resolution  
of the emissions required by the CAMS global forecasts. The CEDS emissions are used for the  
180 extrapolation of the emissions.

For this extrapolation, we have first grouped the CEDS emissions for each species, in order to obtain the  
totals emitted for each country for the sectors included in the CAMS-GLOB-ANT dataset, following  
Table S1. The change in the emissions for each country, species and sector for the 2013-2019, 2014-2019  
185 and 2015-2019 period in the CEDS emissions was then calculated, as shown in Figure 2, which displays  
the results for three countries, the USA, Brazil and China for the emissions of nitrogen oxides. As shown  
by these figures, the changes in the emissions for the three considered periods are very close, and it was  
decided to use the 2014-2019 changes in the emissions for the extrapolation to the most recent years.

After grouping the CEDS emissions in order to match EDGARv5 sectors as shown in Table S1, a factor  
190 quantifying the change in the emissions was then calculated, called “growth factors”, defined as:

$$q = \left( \frac{c_{tf}}{\text{mean}(c_{ti \rightarrow tf})} \right)^{\frac{1}{tf-ti}} \quad (1)$$





where:

-  $q$  is the growth factor

-  $c_{1f}$  is the emission for each country in 2019, and  $c_{1i}$  is the emission for each country for 2014

195 For three EDGARv5 sectors, there is no correspondent sector in the CEDS emissions: “non-ferrous metal production” (nfe), “agriculture waste burning” (awb) and “road transportation with resuspension” (tro\_res). For the nfe and awb sectors, the growth factors are calculated on the basis of the 2013-2015 EDGARv5 values. For tro\_res the same growth factor as for the no\_resuspension is used.

200 An example of the growth factor for the industry sector for the SO<sub>2</sub> emissions is shown in Figure 3: this figure highlights the different patterns of recent changes in the emissions in the different countries of the world.

The emissions at a 0.1x0.1 degree resolution for each species and sector for the years after 2015 are then calculated following a geometric progression, by applying the growth factor as the common ratio for all the grid points in each country. Figure 4 presents in a schematic view of the methodology.

205 In EDGARv5, as indicated above, the emissions of speciated VOCs is available until 2012, from Huang et al. (2017). The extrapolation of the speciated VOCs is based on the calculation of the growth factor for the NMVOCs emissions from CEDS over the 2012-2019 period: an example of the growth factor for Germany is shown in Figure 5. This growth factor is applied to all the speciated VOCs provided by EDGARv5. As indicated above, the agricultural waste sector is not included in CEDS: for this sector, we  
210 have used the growth factor calculated over the 2013-2015 period for the NMVOCs species from EDGARv5.

### 3.3 Aircraft emissions



**Aircraft emissions** are based on the CEDS aircraft emission data for 2000-2014, as described in Hoesly et al. (2018). For the years up to 2014, the emissions are taken from **CEDS**, which provides aircraft emissions for CO<sub>2</sub>, CH<sub>4</sub>, N<sub>2</sub>O, CO, NMVOCs, BC, OC, NH<sub>3</sub> and SO<sub>2</sub>. After 2014, a linear extrapolation using the trends calculated for the period 2012-2014 is applied to obtain the emissions for the most recent years. These dates were chosen because the trends are stable after 2011, except for the year 2020, as indicated in Section 4. The resulting dataset is called CAMS-GLOB-AIR: the current version of CAMS-GLOB-AIR is version 2.1, and it provides the emissions from aircraft from 2000 to 2023, for 25 levels. The altitude of each of these levels is given in Table S3.

To be consistent with the VOCs speciation of the surface anthropogenic emissions, the emissions of speciated VOCs emissions from aircraft in CAMS-GLOB-AIR are based on the annual sector-specific gridmaps of speciated VOCs described by Huang et al. (2017). We used the EDGAR aircraft emissions for landing/taking off and cruise altitudes. We calculated the ratios of the emissions of each individual VOCs to the total NMVOCs species for each of these two altitude levels in the EDGAR dataset, at a 0.1x0.1degree horizontal resolution. The ratios for the landing/taking off level were then applied to the first two levels (0.305 km and 0.915 km) to the CAMS-GLOB-AIR NMVOCs species to get the aircraft emissions of each individual VOC. The ratios for the cruise altitude were applied to all the other levels indicated in Table S2 to obtain the emissions for the rest of the altitudes considered.

#### 4. Results: The CAMS-GLOB-ANT version 5.3 emissions

The CAMS-GLOB-ANT version 5.3 emissions have been obtained using the methodology indicated in the previous sections, i.e. the extrapolation to the most recent years, the application of the CAMS-GLOB-TEMPO temporal profiles and the use of the CAMS-GLOB-SHIP emissions for ships. The results discussed in this paper will mainly focus on version 5.3 of the emissions: the previous version 5.1 and 5.2, which have not been published, only differ from version 5.3 by the use of a previous version of the CAMS-GLOB-SHIP emissions described in Section 2.3.



240 It should be noted that the CAMS-GLOB-ANT version 5.3 emissions do not take into account the impact  
of the 2020 significant changes in emissions related to the lockdowns implemented by many countries to  
fight the Covid-19 pandemic. Another dataset, called CONFORM (Covid-19 adjustmeNt Factors fOR  
eMissions) described in Doumbia et al. (2021) provides adjustment factors at the same spatial resolution  
as the CAMS-GLOB-ANT emissions. The CONFORM adjustment factors are available for several  
245 sectors compatible with the CAMS-GLOB-ANT emissions. The CONFORM factors have not been  
implemented in the CAMS-GLOB-ANT dataset, in order to allow modelers to perform sensitivity studies,  
such as studies of the impact of the Covid-19 lockdowns on the global atmospheric composition.

The CAMS-GLOB-ANT\_v5.3 inventory provides emissions for CO<sub>2</sub>, CH<sub>4</sub>, N<sub>2</sub>O, NO<sub>x</sub>, SO<sub>2</sub>, NH<sub>3</sub>, CO,  
250 BC, OC, NMVOCs and 25 individuals VOCs, for the 2000-2023 period. The emissions are provided as  
monthly averages, at a 0.1x0.1 degree in latitude and longitude spatial resolution. The spatial distribution  
of the yearly averaged emissions for CO, NO<sub>x</sub>, NMVOCs, SO<sub>2</sub>, BC and OC are shown in Figure 6.  
Relative changes in the annual global emissions since 2000 are shown in Figure 7: the relative change  
since the year 2000 is plotted for CO<sub>2</sub> (sum of CO<sub>2</sub>\_excluding\_short\_cycle and short\_cycle), CH<sub>4</sub>, CO,  
255 NO<sub>x</sub>, NMVOCs, SO<sub>2</sub>, BC, OC and NH<sub>3</sub>. For species such as CO<sub>2</sub>, CH<sub>4</sub> and NH<sub>3</sub>, a constant increase is  
seen for the past two decades. For the other species, a change in the trend (i.e. a decrease in the emissions)  
is shown around the years 2011-2014.

This feature is also shown in Table 1, which indicates the global totals emitted for the same compounds  
260 as in Figure 7 for 2000, 2003, 2009, 2012, 2015, 2018, 2021 and 2023 are indicated in Table 1, together  
with the trends from 2000 to 2012, and from 2012 to 2023. Even for the species for which a constant  
increase is seen, the trends after 2012 is significantly lower than before 2012. For CO, NO<sub>x</sub>, SO<sub>2</sub>, BC and  
OC, the emissions are decreasing after 2012, as a result of the implementation of several measures to limit  
the emissions of pollutants.

265



In order to better identify the reasons for the changes in the global total emissions from 2000, Tables S4 and S5 indicate the global totals emitted for several species for the years 2000, 2012 and 2021, as well as the 2000-2012 and 2012-2021 changes: Table S4 indicates the values for transportation (sum of road, non-road and ship transportation), and energy plus industrial activities (sum of the sectors power generation, refineries, industrial processes, fugitive and solvents), while Table S5 considers the emissions for the residential sector and agriculture/ waste (livestock, soils, waste burning, and solid waste-waste water). For the global scale, these tables show that the decrease in the emissions or in the trends after 2012 are mostly due to changes in two sectors, transportation and energy + industrial activities. More details on the changes in the emissions for the different sectors will be given in the next section, which will focus of different world regions and countries.

## 5. Analysis of the CAMS-GLOB-ANT emissions and comparisons with other datasets

This section will analyze the changes in the emissions of CO, NO<sub>x</sub>, NMVOCs, SO<sub>2</sub>, NH<sub>3</sub>, BC and OC for the regions for which regional inventories are available, i.e. Western Europe, Central Europe, the USA, China and India. The countries in each of the Western and Central Europe regions are indicated in Table S6. The changes in the total emissions for each of these regions from 2000 to 2012 and from 2012 to 2023 are shown in Figure 8. This figure shows significant differences between the trends in all species between the two periods.

These changes will be discussed in more details in the following sections. Comparisons will be performed using both regional inventories when available and the following global inventories: EDGAR version 5, EDGAR version 6 (published after the development of CAMS-GLOB-ANT version 5.3) and CEDS described in Section 2 and HTAP version 3 (Crippa et al., 2023 and [https://edgar.jrc.ec.europa.eu/dataset\\_htap\\_v3](https://edgar.jrc.ec.europa.eu/dataset_htap_v3), last access: July 2023). EDGAR and CEDS calculate the emissions on the basis of activity data and emission factors, while the HTAP dataset is based on a mosaic



approach, and uses emissions reported by countries and regions when available. ECLIPSE version 6  
(<https://previous.iiasa.ac.at/web/home/research/researchPrograms/air/ECLIPSEv6b.html>, last access:  
295 July 2023) is based on future scenarios after the year 2000. The older dataset called MACCity (Granier  
et al., 2011), based on a future scenario (RCP8.5, Riahi et al., 2011) after 2005 is also included in these  
comparisons as these emissions are used in the current CAMS reanalysis (Innes et al., 2019).

## 5.1 Western and Central Europe

300

As shown in Figure 8, the emissions of CO, NO<sub>x</sub> and SO<sub>2</sub>, BC have decreased significantly in Western  
and Central Europe since 2000, while the other species do not show a similar pattern. Tables 2 and 3 show  
the totals emitted for a few species for the same years as in Figure 8, and the corresponding percentage  
changes for Western Europe and Central Europe, respectively.

305 Large decreases in the emissions are found for the two 2000-2012 and 2012-2021 periods for all species,  
with the smallest changes for CO<sub>2</sub>, OC and ammonia for both periods, and a slight increase in the NH<sub>3</sub>  
emissions in the past decade: for ammonia, the rather constant emissions during the full period are related  
to slight changes in the main contributor of these emissions, i.e. agriculture practices. Figure S1 shows,  
for Western Europe, the changes in the emissions for the different sectors considered for CO, NO<sub>x</sub>,  
310 NMVOCs and SO<sub>2</sub>, i.e. the species which show the largest changes.

For CO, the decrease in the emissions is mostly due to the implementation of strict rules in all European  
countries on the emissions from transportation: these emissions from transportation change from 28 Tg  
CO/year in 2000 to 2.9 Tg CO/year in 2023, with the largest change during the 2000-2012 period. Such  
changes have significantly modified the contribution of each sector to the total CO emissions in Western  
315 Europe, as shown in Figure 9: while the emissions from transportation represented 74% of the total  
emissions in 2000, they represent 21% of the total in 2023. The highest contribution to the emissions in  
2023 is from the residential (43%) and industrial (26%) sectors.

The decrease in NO<sub>x</sub> emissions is also mostly due to a decrease in the emissions from transportation, as  
shown in Figure S1, and to a lesser extent to the emissions from power generation: the contribution of the



320 NO<sub>x</sub> emissions from transportation decreased from 53% in 2000 to 41% in 2023, and the contribution of power generation decreased from 17% to 11% for the same period. At the same time, the contribution of industrial activities which remained rather constant, increased from 12 to 16%.

NM VOCs emissions have also decreased significantly, as shown in Table 2, mostly during the 2000s and early 2010s. This is mostly due to the decrease in the emissions of transportation: but, as the emissions  
325 from the solvents sector did not decrease, the NM VOCs emissions decreased only by 3% during the past decade.

SO<sub>2</sub> emissions from power plants, which were still rather important in 2000 have been strongly regulated and have decreased from 2.5 T SO<sub>2</sub>/yr to 0.8 Tg SO<sub>2</sub>/yr in 2023. However, the emissions of SO<sub>2</sub> from industrial activities, the 2<sup>nd</sup> largest contributor to the SO<sub>2</sub> emissions have decreased by about 30% of the  
330 full period, which explains the decrease in the emissions reported in Table 1.

Figure 10 shows a comparison of the CAMS-GLOB-ANT\_v5.3 emissions with other inventories, i.e. the global inventories indicated at the beginning of Section 5, as well as with version 5.1 of the regional CAMS-REG dataset (Kuenen et al., 2022). For CO, all the inventories show similar values after 2009, except for MACCity and ECLIPSE, which show lower emissions after 2010: these two inventories are  
335 based on older scenarios after 2000-2005. For NO<sub>x</sub>, the trends are similar among the inventories, with downward trends for the whole period. MACCity and ECLIPSE, based on scenarios, provide higher NO<sub>x</sub> emissions in the most recent years. CAMS-GLOB-ANT and CAMS-REG show rather similar values: these two datasets use very different methodologies, CAMS-REG being based on values reported by countries at the EMEP organization (Wankmüller, 2019), while CAMS-GLOB-ANT is based on  
340 EDGARv5 and CEDS. For SO<sub>2</sub>, the CAMS-GLOB-ANT emissions, which follow the EDGARv5 and the trends in the CEDS emissions are higher than the regional emissions at the end of the period, and slightly lower at the beginning of the period.

Rather similar patterns are seen in the change in the emissions of pollutants and greenhouse gases in  
345 Central Europe (Table 3 and Figure S2), with decreases in somewhat lower magnitudes, related to smaller changes in transportation emissions. The emissions of BC and OC have increased during the first



considered period, mostly due to an increase in residential combustion and to road transportation to a lesser extent.

350 Plots of the comparisons of the emissions for Central Europe with global inventories and the regional CAMS-REG\_v5.1 inventory are shown in Figure S3. The results of the comparison are similar to the comparisons for Western Europe: a larger spread of the values for the NMVOCs emissions can be noticed, which could be related to the use of different average emission factors for these compounds, which represents the emissions of a lumping of different species.

355

## 5.2 United States of America

Changes in the US emissions of several species for the same years as considered in Table 1 are given in  
360 Table 4. The emissions of all species have decreased significantly, except for CH<sub>4</sub> and NH<sub>3</sub>. The increase in the CH<sub>4</sub> is related to oil and gas operations, as well as from livestock agriculture practices. For NH<sub>3</sub>, the constant increase is due to the use of fertilizers and livestock operations.

The changes in the emissions for the different sectors from 2000 to 2023 are shown in Figure S4, for CO, NO<sub>x</sub>, NMVOCs and SO<sub>2</sub>. The large decrease in CO emissions is mostly due to the decrease in the  
365 emissions from transportation, with the implementation of national standards for tailpipe emissions, new fuel programs and improvement in vehicle technologies. NO<sub>x</sub> emissions have decreased importantly until the early 2010s, but a slowdown in the emissions reduction is seen after 2012: this is consistent with the study of Jiang et al. (2018) based on satellite and ground-based observations: this slowdown can be explained by a growing contribution of off-road and diesel vehicles transportation emissions and  
370 industrial activities. The large decrease in SO<sub>2</sub> emissions is mostly due to the strict control in the emissions from power plants.

Comparisons were performed with the global datasets, together with the officially reported emissions by the United State Environmental Protection Agency (EPA). The air pollution emissions trends data from



1970 to 2021 provided by EPA at <https://www.epa.gov/air-emissions-inventories/air-pollutant-emissions-trends-data> (last access: July 2023) were used. A rather good agreement is seen for the CO and NO<sub>x</sub> emissions in the USA, except for the EDGARv6 emissions of CO, which are significantly lower: this is due to the use of smaller emission factors for road transportation and lower small scale combustion of biofuels in the EDGAR6 dataset.

The differences shown in Figure 11 between the inventories are larger for the NMVOCs species, particularly in the early 2010s, with larger emissions from the EPA dataset and the lowest values in the old MACCity emissions and in EDGAR6. These differences are related to the road transportation sector and to a lesser extent to the solvents sector.

### 5.3 China

Table 5, which shows the changes in the emissions of several species for the same years as considered in the previous tables reflects the measures taken as part of the Chinese Air Pollution Prevention and Control Action Plan established by the Chinese Government in the early 2010s. From 2000 to 2012, the emissions of all species (except CH<sub>4</sub> and NH<sub>3</sub>) increased by very large amounts. After 2012, only the emissions of CO<sub>2</sub> continued to increase, as well as the emissions of NMVOCs and NH<sub>3</sub> but with a low percentage.

The changes in the emissions for the different sectors from 2000 to 2023 are shown in Figure S5 for CO, NO<sub>x</sub>, NMVOCs and SO<sub>2</sub>. The largest decreases after 2012 are for SO<sub>2</sub>, for which the emissions from power generation and industrial processes decreased by 64% and 47%, respectively. NO<sub>x</sub> emissions decreased as well, due to a 35% and 9% reduction in the emissions from power generation and industrial activities, respectively and a minor reduction in the emissions from transportation. For CO, the main reductions from 2012 to 2023 are seen in the sectors of transportation (-24%), residential (-20%) and industrial activities (-11%). The NMVOCs emissions have started to decrease slightly in 2015, as a result of a decrease in the emissions from transportation and from industrial processes. However, the emissions from solvents increased by 14% between 2012 and 2023.

400





Comparisons were performed with the global datasets, as well as with two regional inventories for China: the REAS (Regional Emission inventory in Asia) version 3 published by Kurokawa et al. (2020) were used, downloaded from the REAS website (<https://www.nies.go.jp/REAS/>, last access July 2023), as well as the MEIC (Multi-resolution Emission Inventory model for Climate and air pollution research: [meicmodel.org.cn](http://meicmodel.org.cn), last access July, 2023). REAS and MEIC provide emissions for a large number of species (except for CH<sub>4</sub>) for 1950-2015 (REASv3) and 2008-2017 (version 1.3) for MEIC, respectively.

Figure 12 shows the differences between these inventories for CO, NO<sub>x</sub>, NMVOCs and SO<sub>2</sub>. For CO, large differences exist at the beginning of the 2000s, but the total emissions for China are closer at the end of the period. The large differences are mostly due to different estimates of the emissions from transportation between the global inventories, more particularly CEDS and EDGAR. It should be noted that the two regional inventories, MEIC and REASv3 show CO emissions closer to the EDGAR emissions in the 2000s and closer than the CEDS emissions in the mid-2010s.

NO<sub>x</sub> emissions show similar patterns among the global and regional datasets, except for MACCity, which was developed before the Chinese plans for emissions reductions. In 2018, the NO<sub>x</sub> emissions from all the inventories are within 15% of each other. NMVOCs emissions agree rather well in the 2010s, except for the old MACCity dataset and the ECLIPSEv6 inventory, which is also based on future scenarios. For SO<sub>2</sub>, the agreement is rather good at the beginning of the 2000s, but the trends in the emission differ after 2013-2014: the EDGAR v5 and v6 emissions show smaller trends than the other datasets. The emissions provided by CAMS-GLOB-ANT\_v5.3 first follow the EDGAR emissions: as the recent trends are based on CEDS, the trend in the CAMS emissions is closer to the trend shown by the regional emissions. As a result, the values of the CAMS-GLOB-ANT SO<sub>2</sub> emission in 2015-2019 are between the EDGAR and the emissions provided by the other datasets.

## 425 5.4 India



Table 6 shows the changes in the emissions of several species for the same years as considered in the previous tables. This table shows the large increases in the emissions of all species in this country from 2000 to 2012. After that date, some measures have started to be taken to start reducing intense  
430 pollution events, as part of the Indian National Clean Air Programme (Ganguly et al., 2020). Most emissions have continued to increase but at a slower rate than before 2012.

Figure S6 shows the changes in the CAMS-GLOB-ANT\_v5.3 emissions of CO, NO<sub>x</sub>, NMVOCs and SO<sub>2</sub> for the 2000-2023 period in India for the different sectors.

For all species, the emissions from the residential sector were almost constant during the considered  
435 period. The CO emissions peaked in 2015, and decrease afterwards as a result of the implementation of measures in the transportation and industrial sectors. The NO<sub>x</sub> emissions peaked as well in 2015, and stayed rather constant afterwards: this explains the slight increase in the emissions from 2012, driven by an increase in the emissions from transportation. Emissions of NMVOCs have continued to increase, mostly because of a constant increase of about 33% of the emissions from solvents. The moderate increase  
440 after 2012 is related to a decrease in the emissions from traffic of about 16% from 2015 to 2023.

SO<sub>2</sub> emissions are driven by the emissions related to power generation and industries, which have more than doubled between 2000 and 2014, followed by rather constant emissions. For BC, emissions from industrial activities and the residential sector represent 40% and 36% of the emissions, respectively. The emissions from the industrial sector decreased by about 20% from 2014 to 2023, which explains the slight  
445 decrease of the BC emissions during the 2012-2023 period.

Figure 13 shows a comparison of the emissions of CO, NO<sub>x</sub>, NMVOCs and SO<sub>2</sub> with the global inventories mentioned in the previous sections and with the REASv3 regional inventory for Asia. The MACCity emissions, based on an old dataset (Granier et al., 2011) and the RCP8.5 scenario (Riahi et al.,  
450 2011) provides very different emissions than the other datasets. The other inventories are generally in a good agreement, though the recent trends in the CAMS-GLOB-ANT emissions can differ significantly: for example, the NO<sub>x</sub> emissions are rather constant after 2015, while they increase in the ECLIPSE dataset (based on a future scenario). For NMVOCs, the CAMS-GLOB-ANT emissions are rather stable



455 after 2015, which is consistent with the HTAPv3 and EDGARv6: however, in 2015, CAMS-GLOB-ANT  
emissions are about 15% lower than the HTAPv3 emissions and 20% higher than the EDGARv6  
emissions. For SO<sub>2</sub>, the CAMS-GLOB-ANT emissions are in good agreement with the HTAPv3,  
EDGARv5 and EDGARv6 emissions, and significantly higher than the CEDS emissions. For all species,  
the CAMS-GLOB-ANT emissions are globally in agreement with the REAS regional inventory.

## 460 6. Availability of the data

The gridded maps (CAMS-GLOB-ANT\_v5.3) as monthly means data described in this manuscript can  
be accessed as NetCDF (Network Common Data Format) files at <https://doi.org/10.24380/eets-qd81>  
(Soulie et al., 2023). They can also be accessed through the Emissions of atmospheric Compounds and  
465 Compilation of Ancillary Data (ECCAD) system at <https://permalink.aeris-data.fr/CAMS-GLOB-ANT>  
and with a login account (<https://eccad.aeris-data.fr/>, last access: July 2023). For review purposes,  
ECCAD has set up an anonymous repository where subsets of CAMS-GLOB-ANT\_v5.3 data can be  
accessed directly (Soulie et al., 2023; <https://eccad.aeris-data.fr/essd-surf-emis-cams-ant/>, last access:  
July 2023).

470 The CAMS-GLOB-ANT dataset is licensed under the Creative Commons Attribution 4.0 International  
licence (CC BY 4.0). The summary of the licence can be found here:  
<https://creativecommons.org/licenses/by/4.0/legalcode>.

## 475 7. Conclusions

The paper describes version 5 of CAMS-GLOB-ANT, a new inventory publicly available for global air  
quality and climate forecasts and reanalyses. The emission dataset is based on different datasets, i.e. the  
global inventories EDGAR and CEDS, as well as on temporal profiles from the CAMS-GLOB-TEMPO,  
480 ship emissions from CAMS-GLOB-SHIP datasets. A dataset called CAMS-GLOB-AIR provides also 3-

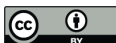

dimensional emissions from aircraft exhaust. The CAMS-GLOB-ANT inventory was developed under the Copernicus Atmosphere Monitoring Service project (CAMS-81: global and regional emissions) as part of the European Union's Copernicus Earth Observation Programme.

485 CAMS-GLOB-ANT includes the emissions of 36 species, including the greenhouse gases CO<sub>2</sub> (excluding short cycle and short-cycle), CH<sub>4</sub> and N<sub>2</sub>O, atmospheric pollutants (CO, NO<sub>x</sub>, NMVOCs, SO<sub>2</sub>, BC, OC, NH<sub>3</sub> plus 25 speciated hydrocarbons). The spatial resolution of the gridded emissions is 0.1x0.1 degree in latitude and longitude, and the temporal resolution is monthly.

490 The paper discussed the changes in the emissions for the main greenhouse gases and air pollutants, with a focus on CO, NO<sub>x</sub>, NMVOCs and SO<sub>2</sub>. Comparisons are made with the other global inventories publicly available and with regional emissions datasets available for Europe, the USA, China and India.

495 It should be noted that updated versions of the CAMS-GLOB-ANT dataset will be developed during the coming years. The current limitations of the inventory will be considered, such as the constant NMVOCs speciation after 2012 (following the EDGAR VOCs speciation), the lack of data for the extrapolation of the agriculture waste factor, and possibly the inclusion of the CONFORM adjustment factors for the Covid-19 lockdowns directly into the emission dataset.

## 8. Author contributions

500

AS and CG developed the dataset and created the emission inventories. SD and NZ performed the emission data formatting and the upload to the database. TD, SK and CL participated in the analysis of the emissions. MG and JPJ provided the CAMS-GLOB-TEMPO and CAMS-GLOB-SHIP datasets. MC and DG provided the EDGAR emissions and RH and SS gave access to the gridded CEDS data.

505

## 9. Competing Interests



The contact author has declared that none of the authors has any competing interests.

## 510 10. Acknowledgments

The development of the CAMS-GLOB-ANT dataset has been funded by the Copernicus Atmosphere Monitoring Service (CAMS), which is implemented by the European Centre for Medium-Range Weather Forecasts (ECMWF) on behalf of the European Commission.

515

## References

Crippa, M., Guizzardi, D., Muntean, M., Schaaf, E., Dentener, F., van Aardenne, J. A., Monni, S., Doering, U., Olivier, J. G. J., Pagliari, V., and Janssens-Maenhout, G.: Gridded emissions of air pollutants for the period 1970–2012 within EDGAR v4.3.2, *Earth Syst. Sci. Data*, 10, 1987–2013, doi:10.5194/essd-  
520 10-1987-2018, 2018.

Crippa, M., Guizzardi, D., Butler, T., Keating, T., Wu, R., Kaminski, J., Kuenen, J., Kurokawa, J., Chatani, S., Morikawa, T., Pouliot, G., Racine, J., Moran, M. D., Klimont, Z., Manseau, P. M., Mashayekhi, R., Henderson, B. H., Smith, S. J., Suchyta, H., Muntean, M., Solazzo, E., Banja, M., Schaaf,  
525 E., Pagani, F., Woo, J.-H., Kim, J., Monforti-Ferrario, F., Pisoni, E., Zhang, J., Niemi, D., Sassi, M., Ansari, T., and Foley, K.: HTAP\_v3 emission mosaic: a global effort to tackle air quality issues by quantifying global anthropogenic air pollutant sources, *Earth Syst. Sci. Data Discuss.* [preprint], <https://doi.org/10.5194/essd-2022-442>, in review, 2023.

530 Flemming, J., Huijnen, V., Arteta, J., Bechtold, P., Beljaars, A., Blechschmidt, A.-M., Diamantakis, M., Engelen, R. J., Gaudel, A., Inness, A., Jones, L., Josse, B., Katragkou, E., Marecal, V., Peuch, V.-H., Richter, A., Schultz, M. G., Stein, O., and Tsikerdekis, A.: Tropospheric chemistry in the Integrated



Forecasting System of ECMWF, *Geosci. Model Dev.*, 8, 975–1003, <https://doi.org/10.5194/gmd-8-975-2015>, 2015.

535

Granier, C., Bessagnet, B., Bond, T., A. D'Angiola, H. Denier van der Gon, G. J. Frost, A. Heil, J. W. Kaiser, S. Kinne, Z. Klimont, S. Kloster, J.-F. Lamarque, C. Lioussé, T. Masui, F. Meleux, A. Mieville, T. Ohara, J.-C. Raut, K. Riahi, M. G. Schultz, S. J. Smith, A. Thompson, J. van Aardenne, G. R. van der Werf, D. van Vuuren, Evolution of anthropogenic and biomass burning emissions of air pollutants at  
540 global and regional scales during the 1980–2010 period, *Climatic Change*, 109, 163  
<https://doi.org/10.1007/s10584-011-0154-1>, 2011.

Ganguly, T., K. L. Selvaraj, S. K. Guttikunda, National Clean Air Programme (NCAP) for Indian cities:  
Review and outlook of clean air action plans, *Atmos. Env.*, 8,  
545 <https://doi.org/10.1016/j.aeoa.2020.100096>, 2020.

Guevara, M., Jorba, O., Tena, C., Denier van der Gon, H., Kuenen, J., Elguindi, N., Darras, S., Granier,  
C., and Pérez García-Pando, C.: Copernicus Atmosphere Monitoring Service TEMPORal profiles  
(CAMs-TEMPO): global and European emission temporal profile maps for atmospheric chemistry  
550 modelling, *Earth Syst. Sci. Data*, 13, 367–404, <https://doi.org/10.5194/essd-13-367-2021>, 2021.

Hoesly, R. M., Smith, S. J., Feng, L., Klimont, Z., Janssens-Maenhout, G., Pitkanen, T., Seibert, J. J., Vu,  
L., Andres, R. J., Bolt, R. M., Bond, T. C., Dawidowski, L., Kholod, N., Kurokawa, J.-I., Li, M., Liu, L.,  
Lu, Z., Moura, M. C. P., O'Rourke, P. R., and Zhang, Q.: Historical (1750–2014) anthropogenic emissions  
555 of reactive gases and aerosols from the Community Emissions Data System (CEDs), *Geosci. Model Dev.*,  
11, 369–408, <https://doi.org/10.5194/gmd-11-369-2018>, 2018.

Huang, G., Brook, R., Crippa, M., Janssens-Maenhout, G., Schieberle, C., Dore, C., Guizzardi, D.,  
Muntean, M., Schaaf, E., and Friedrich, R.: Speciation of anthropogenic emissions of non-methane



560 volatile organic compounds: a global gridded data set for 1970–2012, *Atmos. Chem. Phys.*, 17, 7683–  
7701, <https://doi.org/10.5194/acp-17-7683-2017>, 2017.

Inness, A., Ades, M., Agustí-Panareda, A., Barré, J., Benedictow, A., Blechschmidt, A.-M., Dominguez,  
J. J., Engelen, R., Eskes, H., Flemming, J., Huijnen, V., Jones, L., Kipling, Z., Massart, S., Parrington,  
565 M., Peuch, V.-H., Razinger, M., Remy, S., Schulz, M., and Suttie, M.: The CAMS reanalysis of  
atmospheric composition, *Atmos. Chem. Phys.*, 19, 3515–3556, [https://doi.org/10.5194/acp-19-3515-  
2019](https://doi.org/10.5194/acp-19-3515-2019), 2019.

Jiang, Z., McDonald, B. C., Worden, H., Worden, J. R., Miyazaki, K., Qu, Z., Henze, D. K., Jones, D. B.  
570 A., Arellano, A. F., Fischer, E. V., Zhu, L., F. Boersma, Unexpected slowdown of US pollutant emission  
reduction in the past decade, *Proc. Natl. Acad. Sci. U.S.A.*, 115, 5099-5104,  
<https://doi.org/10.1073/pnas.1801191115>, 2018.

Johansson, L., Jalkanen, J.-P., and Kukkonen, J. Global assessment of shipping emissions in 2015 on a  
575 high spatial and temporal resolution *Atmospheric Environment* 167, 403-415,  
<https://doi.org/10.1016/j.atmosenv.2017.08.042>, 2017.

Kuenen, J., Dellaert, S., Visschedijk, A., Jalkanen, J.-P., Super, I., and Denier van der Gon, H.: CAMS-  
REG-v4: a state-of-the-art high-resolution European emission inventory for air quality modelling, *Earth*  
580 *Syst. Sci. Data*, 14, 491–515, <https://doi.org/10.5194/essd-14-491-2022>, 2022.

Kurokawa, J. and Ohara, T.: Long-term historical trends in air pollutant emissions in Asia: Regional  
Emission inventory in ASia (REAS) version 3, *Atmos. Chem. Phys.*, 20, 12761-12793,  
<https://doi.org/10.5194/acp-20-12761-2020>, 2020.

585



McDuffie, E. E., Smith, S. J., O'Rourke, P., Tibrewal, K., Venkataraman, C., Marais, E. A., Zheng, B., Crippa, M., Brauer, M., and Martin, R. V.: A global anthropogenic emission inventory of atmospheric pollutants from sector- and fuel-specific sources (1970–2017): an application of the Community Emissions Data System (CEDS), *Earth Syst. Sci. Data*, 12, 3413–3442, <https://doi.org/10.5194/essd-12-3413-2020>, 2020.

Miller, B. B. and Carter, C.: The test article, *J. Sci. Res.*, 12, 135–147, doi:10.1234/56789, 2015.  
Smith, A. A., Carter, C., and Miller, B. B.: More test articles, *J. Adv. Res.*, 35, 13–28, doi:10.2345/67890, 2014.

O'Rourke, P. R., Smith, S. J., Mott, A., Ahsan, H., McDuffie, E. E., Crippa, M., Klimont, S., McDonald, B., Z., Wang, Nicholson, M. B, Feng, L., and Hoesly, R. M., Community Emissions Data System (Version 04-21-2021). Zenodo. <https://doi.org/10.5281/zenodo.4737769>, 2021a.

O'Rourke, P. R., Smith, S. J., Mott, A., Ahsan, H., McDuffie, E. E., Crippa, M., Klimont, S., McDonald, B., Z., Wang, Nicholson, M. B, Feng, L., and Hoesly, R. M., Community Emissions Data System Gridded Emissions (Version 04-21-2021). PNNL. <https://doi.org/10.25584/PNNLDataHub/1779095>, 2021b.

Riahi, K., Rao, S., Krey, V., Cho, C., Chirkov, V., Fischer, G., Kindermann, G., Nakicenovic, N. and Rafaj, P., RCP 8.5 - A scenario of comparatively high greenhouse gas emissions. *Climatic change*, 109, 33-57, <https://doi.org/10.1007/s10584-011-0149-y>, 2011.

Soulie, A., C. Granier, S. Darras, N. Zilbermann, T. Doumbia, M. Guevara, J.-P. Jalkanen, S. Keita, C. Liousse, M. Crippa, D. Guizzardi, R. Hoesly, S. J. Smith, Global Anthropogenic Emissions (CAMSGLOB-ANT) for the Copernicus Atmosphere Monitoring Service Simulations of Air Quality Forecasts and Reanalyses, <https://doi.org/10.24380/eets-qd81>, submitted to *Earth Syst. Sci. Data*, 2023.





615 Tang, W., Emmons, L. K., Worden, H. M., Kumar, R., He, C., Gaubert, B., Zheng, Z., Tilmes, S.,  
Buchholz, R. R., Martinez-Alonso, S.-E., Granier, C., Soulie, A., McKain, K., Daube, B., Peischl, J.,  
Thompson, C., and Levelt, P.: Application of the Multi-Scale Infrastructure for Chemistry and Aerosols  
version 0 (MUSICAv0) for air quality in Africa, *Geosci. Model Dev. Discuss.* [preprint],  
<https://doi.org/10.5194/gmd-2023-50>, in review, 2023.

620 Wankmüller, R.: Updated documentation of the EMEP gridding system, Technical Report CEIP 6/2019,  
available at:  
[https://www.ceip.at/fileadmin/inhalte/ceip/00\\_pdf\\_other/2019/emep\\_gridding\\_system\\_documentation\\_20191125.pdf](https://www.ceip.at/fileadmin/inhalte/ceip/00_pdf_other/2019/emep_gridding_system_documentation_20191125.pdf) (last access: July 2023), 2019.

625



## Tables

630 Table 1: Global totals emitted for selected species and associated percentage changes. CO<sub>2</sub> (fossil) corresponds to the CO<sub>2</sub> species, excluding short cycle. The NO<sub>x</sub> emissions are reported as NO (M=30.01 g/mol).

|                          | 2000   | 2003   | 2006   | 2009   | 2012   | 2015   | 2018   | 2021   | 2023   | Change 2012-2000 | Change 2023-2012 |
|--------------------------|--------|--------|--------|--------|--------|--------|--------|--------|--------|------------------|------------------|
| CO <sub>2</sub> (fossil) | 2.53e4 | 2.72e4 | 3.04e4 | 3.13e4 | 3.47e4 | 3.55e4 | 3.59e4 | 3.63e4 | 3.67e4 | +37%             | +5.7%            |
| CH <sub>4</sub>          | 302    | 310    | 331    | 339    | 360    | 370    | 372    | 375    | 378    | +19%             | +5%              |
| CO                       | 556    | 528    | 526    | 537    | 564    | 578    | 562    | 550    | 542    | +1.4%            | -4%              |
| NO <sub>x</sub>          | 72.6   | 73.4   | 76.7   | 74.4   | 79.3   | 78.2   | 75.1   | 73.0   | 71.8   | +9%              | -10%             |
| NMVOCS                   | 122    | 125    | 132    | 133    | 143    | 149    | 147    | 146    | 145    | +17%             | +1%              |
| SO <sub>2</sub>          | 97.9   | 94.7   | 101    | 100    | 105    | 102    | 92.7   | 79.1   | 76.0   | +7%              | -28%             |
| BC                       | 3.8    | 3.91   | 4.16   | 4.47   | 4.79   | 4.68   | 4.56   | 4.45   | 4.40   | +26%             | -8%              |
| OC                       | 9.9    | 10     | 10.6   | 11.1   | 11.6   | 11.8   | 11.6   | 11.3   | 11.2   | +17%             | -3%              |
| NH <sub>3</sub>          | 40.9   | 42.5   | 44.4   | 46     | 47.7   | 49.1   | 49.6   | 50.2   | 50.6   | +17%             | +6%              |

635

Table 2: Totals emitted and associated percentage changes for Western Europe. The values for the NO<sub>x</sub> emissions are given in Tg NO<sub>x</sub>-NO/yr.

|                          | 2000   | 2003   | 2006   | 2009   | 2012   | 2015   | 2018   | 2021   | 2023   | Change 2012-2000 | Change 2023-2012 |
|--------------------------|--------|--------|--------|--------|--------|--------|--------|--------|--------|------------------|------------------|
| CO <sub>2</sub> (fossil) | 3.17e3 | 3.28e3 | 3.26e3 | 2.91e3 | 2.85e3 | 2.68e3 | 2.59e3 | 2.52e3 | 2.48e3 | -9%              | -13%             |
| CH <sub>4</sub>          | 21.8   | 20.7   | 20.4   | 18.3   | 18.6   | 18.4   | 18.3   | 18.2   | 18.2   | -15%             | -2%              |
| CO                       | 38.5   | 31.2   | 23.9   | 18.7   | 15.9   | 14.6   | 14.1   | 13.8   | 13.6   | -58%             | -14%             |
| NO <sub>x</sub>          | 6.4    | 6.0    | 5.3    | 4.5    | 4.0    | 3.7    | 3.4    | 3.1    | 3.0    | -37%             | -26%             |
| NMVOCS                   | 8.5    | 7.6    | 6.7    | 6.1    | 5.9    | 5.8    | 5.8    | 5.7    | 5.7    | -31%             | -3%              |
| SO <sub>2</sub>          | 4.9    | 3.9    | 3.3    | 2.6    | 2.5    | 2.2    | 1.9    | 1.7    | 1.6    | -49%             | -38%             |
| BC                       | 0.18   | 0.16   | 0.15   | 0.14   | 0.13   | 0.12   | 0.11   | 0.1    | 0.1    | -29%             | -22%             |
| OC                       | 0.27   | 0.26   | 0.25   | 0.26   | 0.25   | 0.25   | 0.24   | 0.23   | 0.23   | -7%              | -10%             |
| NH <sub>3</sub>          | 4.6    | 4.5    | 4.3    | 4.3    | 4.3    | 4.4    | 4.4    | 4.4    | 4.4    | -7%              | +3%              |

640



645 Table 3: Totals emitted and associated percentage changes for Central Europe. CO<sub>2</sub>\_excl corresponds to the CO<sub>2</sub> species, excluding short cycle. The values for the NO<sub>x</sub> emissions are given in Tg NO<sub>x</sub>-NO/yr.

|                          | 2000 | 2003  | 2006  | 2009  | 2012 | 2015  | 2018  | 2021  | 2023  | Change 2012-2000 | Change 2023-2012 |
|--------------------------|------|-------|-------|-------|------|-------|-------|-------|-------|------------------|------------------|
| CO <sub>2</sub> (fossil) | 843  | 886   | 908   | 825   | 829  | 793   | 801   | 816   | 819   | -1.7%            | -1.2%            |
| CH <sub>4</sub>          | 7.7  | 6.5   | 6.5   | 6.2   | 6.4  | 6.3   | 6.3   | 6.3   | 6.3   | -17%             | -2%              |
| CO                       | 9.2  | 8.8   | 8.9   | 7.8   | 7.4  | 7.1   | 7     | 6.8   | 6.8   | -20%             | -8%              |
| NO <sub>x</sub>          | 1.6  | 1.6   | 1.6   | 1.4   | 1.3  | 1.2   | 1.1   | 1.1   | 1.0   | -19%             | -19%             |
| NMVOCs                   | 2.7  | 2.7   | 2.7   | 2.5   | 2.4  | 2.4   | 2.4   | 2.4   | 2.4   | -9%              | 0%               |
| SO <sub>2</sub>          | 4.2  | 3.9   | 3.2   | 2.8   | 2.8  | 2.6   | 2.0   | 1.7   | 1.6   | -33%             | -43%             |
| BC                       | 0.06 | 0.063 | 0.067 | 0.070 | 0.74 | 0.072 | 0.070 | 0.068 | 0.068 | +23%             | -8%              |
| OC                       | 0.18 | 0.18  | 0.20  | 0.21  | 0.22 | 0.22  | 0.21  | 0.21  | 0.21  | +21%             | -5%              |
| NH <sub>3</sub>          | 1.3  | 1.3   | 1.3   | 1.3   | 1.3  | 1.4   | 1.4   | 1.4   | 1.4   | +2%              | +7%              |

650

Table 4: Totals emitted and associated percentage changes for the USA. CO<sub>2</sub>\_excl corresponds to the CO<sub>2</sub> species, excluding short cycle. The values for the NO<sub>x</sub> emissions are given in Tg NO<sub>x</sub>-NO/yr.

655

|                          | 2000  | 2003  | 2006  | 2009  | 2012  | 2015  | 2018  | 2021  | 2023  | Change 2012-2000 | Change 2023-2012 |
|--------------------------|-------|-------|-------|-------|-------|-------|-------|-------|-------|------------------|------------------|
| CO <sub>2</sub> (fossil) | 5.6e3 | 5.5e3 | 5.5e3 | 5.0e3 | 5.0e3 | 4.9e3 | 4.9e3 | 4.8e3 | 4.8e3 | -11%             | -4%              |
| CH <sub>4</sub>          | 23.9  | 22.4  | 22.4  | 22.5  | 23.9  | 25.1  | 25.3  | 25.5  |       | 0%               | +7%              |
| CO                       | 85.6  | 68.1  | 54.2  | 46.1  | 45.4  | 45.7  | 42.3  | 39.3  | 37.4  | -47%             | -18%             |
| NO <sub>x</sub>          | 10.9  | 10.2  | 9.5   | 8.1   | 8.3   | 8.4   | 7.4   | 6.6   | 6.3   | -24%             | -24%             |
| NMVOCs                   | 12.2  | 11.1  | 10.7  | 9.9   | 9.9   | 10.2  | 9.6   | 9.1   | 8.8   | -18%             | -12%             |
| SO <sub>2</sub>          | 13.7  | 12.0  | 10.9  | 9.7   | 8.9   | 8.1   | 5.9   | 4.4   | 3.6   | -35%             | -59%             |
| BC                       | 0.22  | 0.21  | 0.21  | 0.16  | 0.17  | 0.17  | 0.16  | 0.15  | 0.14  | -19%             | -19%             |
| OC                       | 0.39  | 0.35  | 0.35  | 0.33  | 0.33  | 0.34  | 0.32  | 0.3   | 0.3   | -14%             | -12%             |
| NH <sub>3</sub>          | 3.6   | 3.8   | 3.9   | 3.8   | 3.9   | 3.9   | 4.0   | 4.1   | 4.2   | +9%              | +8%              |

660



Table 5: Totals emitted and associated percentage changes for China. CO<sub>2</sub>\_excl corresponds to the CO<sub>2</sub> species, excluding short cycle. The values for the NO<sub>x</sub> emissions are given in Tg NO<sub>x</sub>-NO/yr.

|                          | 2000  | 2003  | 2006  | 2009  | 2012  | 2015  | 2018  | 2021  | 2023  | Change 2012-2000 | Change 2023-2012 |
|--------------------------|-------|-------|-------|-------|-------|-------|-------|-------|-------|------------------|------------------|
| CO <sub>2</sub> (fossil) | 3.5e3 | 4.5e3 | 6.6e3 | 7.9e3 | 9.7e3 | 1.0e4 | 1.0e4 | 1.1e4 | 1.1e4 | +180%            | +14%             |
| CH <sub>4</sub>          | 44.6  | 46.1  | 53.2  | 55.7  | 59.5  | 60.6  | 61.3  | 62.1  | 62.6  | -17%             | +5%              |
| CO                       | 101   | 99    | 113   | 115   | 124   | 125   | 120   | 114   | 111   | +23%             | -10%             |
| NO <sub>x</sub>          | 8.3   | 10.0  | 13.6  | 14.5  | 15.7  | 15.9  | 14.6  | 14.2  | 14.0  | +90%             | -11%             |
| NMVOCs                   | 18.9  | 20.4  | 23.9  | 26.0  | 28.4  | 30.1  | 29.7  | 29.4  | 29.2  | +50%             | +3%              |
| SO <sub>2</sub>          | 19.6  | 21.4  | 28.0  | 29.3  | 30.5  | 29.1  | 23.0  | 18.5  | 16.1  | +56%             | -47%             |
| BC                       | 0.0   | 1.0   | 1.1   | 1.3   | 1.4   | 1.2   | 1.2   | 1.1   | 1.1   | +54%             | -25%             |
| OC                       | 2.4   | 2.4   | 2.7   | 2.7   | 2.7   | 2.6   | 2.4   | 2.2   | 2.1   | +21%             | -22%             |
| NH <sub>3</sub>          | 8.2   | 8.4   | 8.8   | 8.8   | 8.6   | 8.6   | 8.7   | 8.7   | 8.7   | +4%              | +1%              |

665

Table 6: Totals emitted and associated percentage changes for India. CO<sub>2</sub>\_excl corresponds to the CO<sub>2</sub> species, excluding short cycle. The values for the NO<sub>x</sub> emissions are given in Tg NO<sub>x</sub>-NO/yr.

|                          | 2000 | 2003  | 2006  | 2009  | 2012  | 2015  | 2018  | 2021  | 2023  | Change 2012-2000 | Change 2023-2012 |
|--------------------------|------|-------|-------|-------|-------|-------|-------|-------|-------|------------------|------------------|
| CO <sub>2</sub> (fossil) | 963  | 1.0e3 | 1.2e3 | 1.6e3 | 1.9e3 | 2.2e3 | 2.3e3 | 2.4e3 | 2.5e3 | +99%             | +32%             |
| CH <sub>4</sub>          | 27.3 | 28.0  | 29.7  | 31.0  | 32.4  | 33.2  | 33.5  | 33.7  | 33.9  | +19%             | +5%              |
| CO                       | 48   | 49    | 53    | 58    | 64    | 69    | 67    | 64    | 63    | +34%             | -10%             |
| NO <sub>x</sub>          | 3.3  | 3.4   | 3.9   | 4.9   | 5.8   | 6.6   | 6.6   | 6.6   | 6.6   | +79%             | +13%             |
| NMVOCs                   | 8.9  | 9.4   | 10.1  | 11.1  | 12.2  | 13.3  | 13.1  | 12.9  | 12.8  | +37%             | +5%              |
| SO <sub>2</sub>          | 4.9  | 5.1   | 5.8   | 7.9   | 9.9   | 11.2  | 11.2  | 11.2  | 11.2  | +103%            | +13%             |
| BC                       | 0.51 | 0.51  | 0.56  | 0.62  | 0.73  | 0.78  | 0.74  | 0.71  | 0.71  | +43%             | -6%              |
| OC                       | 1.4  | 1.4   | 1.4   | 1.6   | 1.7   | 1.8   | 1.8   | 1.7   | 1.7   | +26%             | -0.6%            |
| NH <sub>3</sub>          | 4.3  | 4.4   | 4.9   | 5.3   | 5.6   | 5.8   | 5.8   | 5.9   | 6.0   | +32%             | +6%              |

675

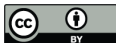

## Figures

680

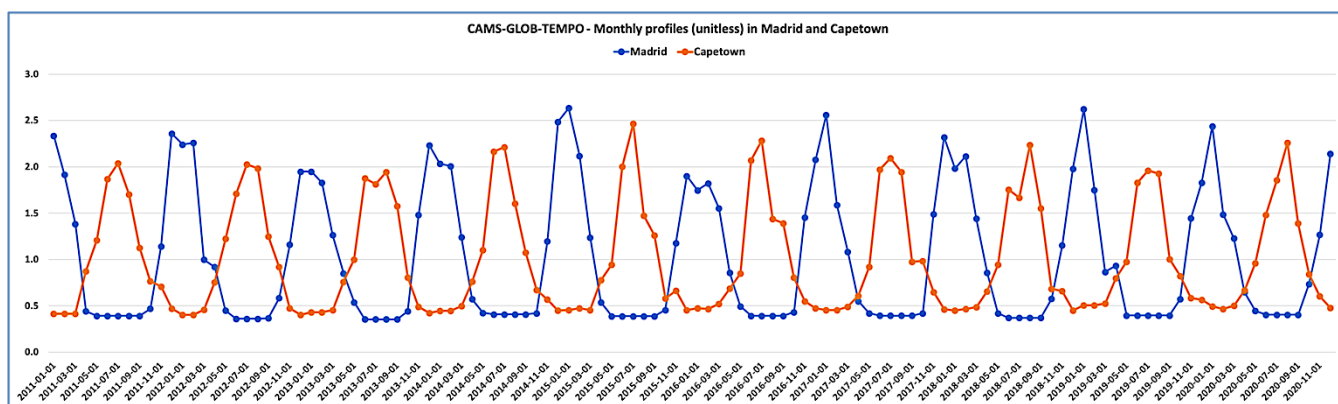

Figure 1: monthly weights from CAMS-GLOB-TEMPO in Madrid (Spain) and Capetown (South Africa)

685

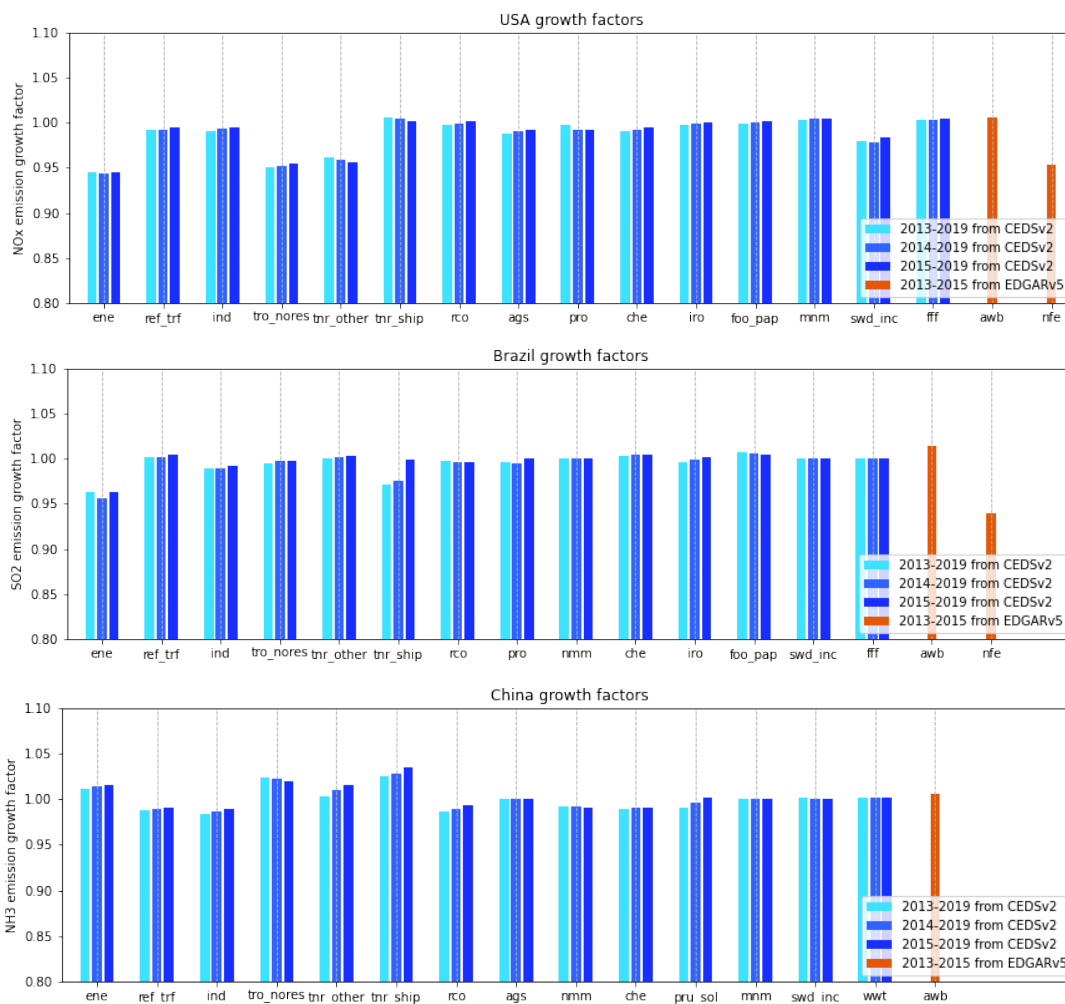

Figure 2: Changes in the emissions for different periods and different sectors

690



695

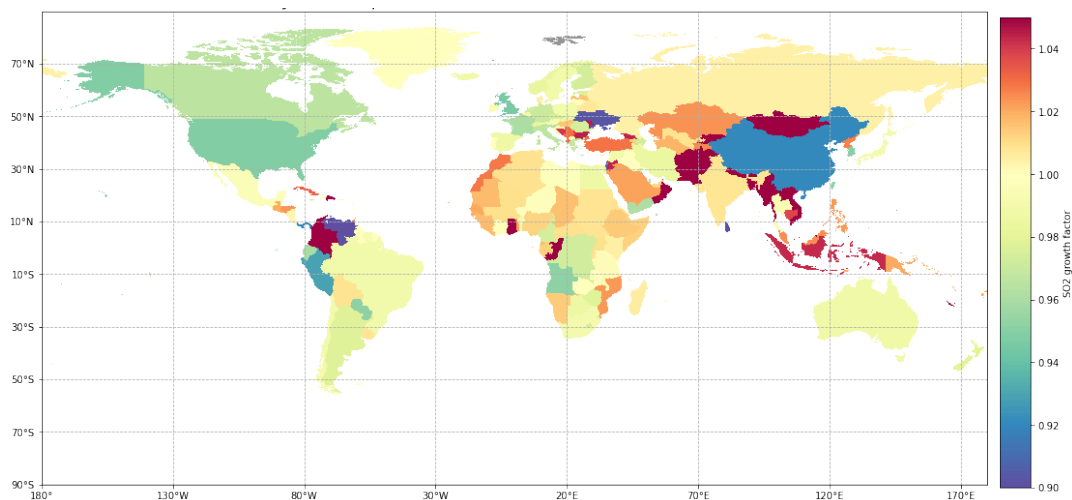

Figure 3: Growth factor for the industry factor used to extrapolate the SO<sub>2</sub> emissions

700

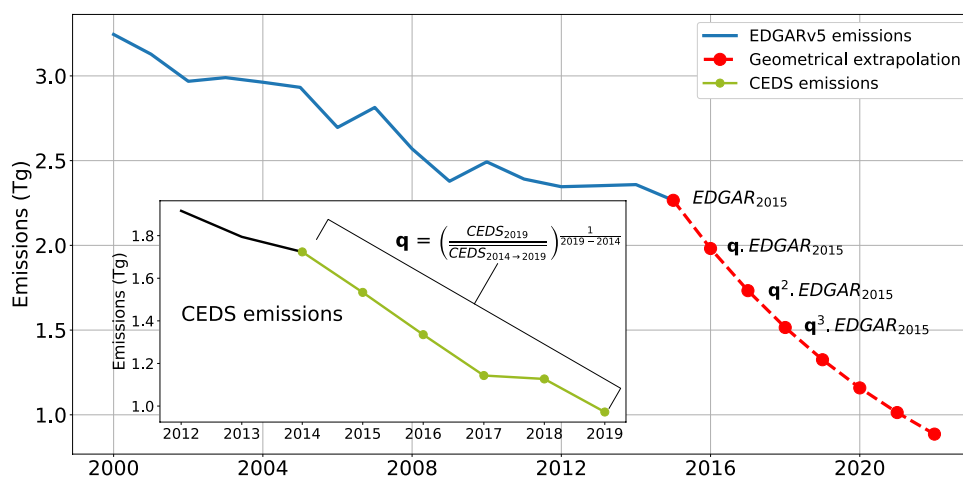

Figure 4: schematic view of the methodology used to calculate the CAMS-GLOB-ANT emissions for the most recent years.

705

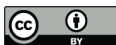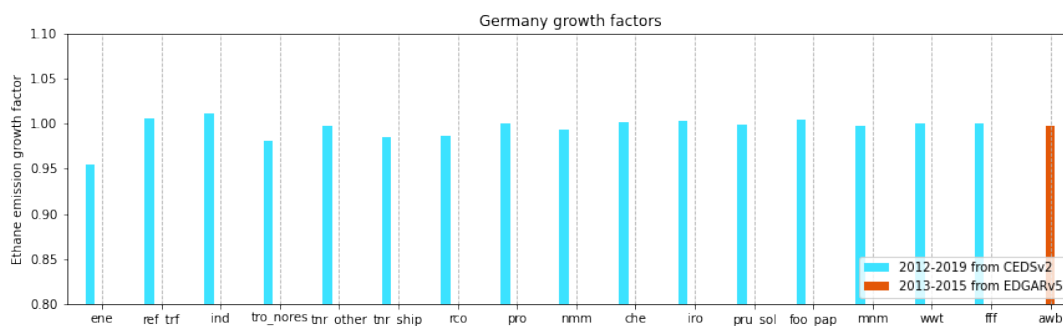

Figure 5: growth factor for the NMVOCs species for Germany

710



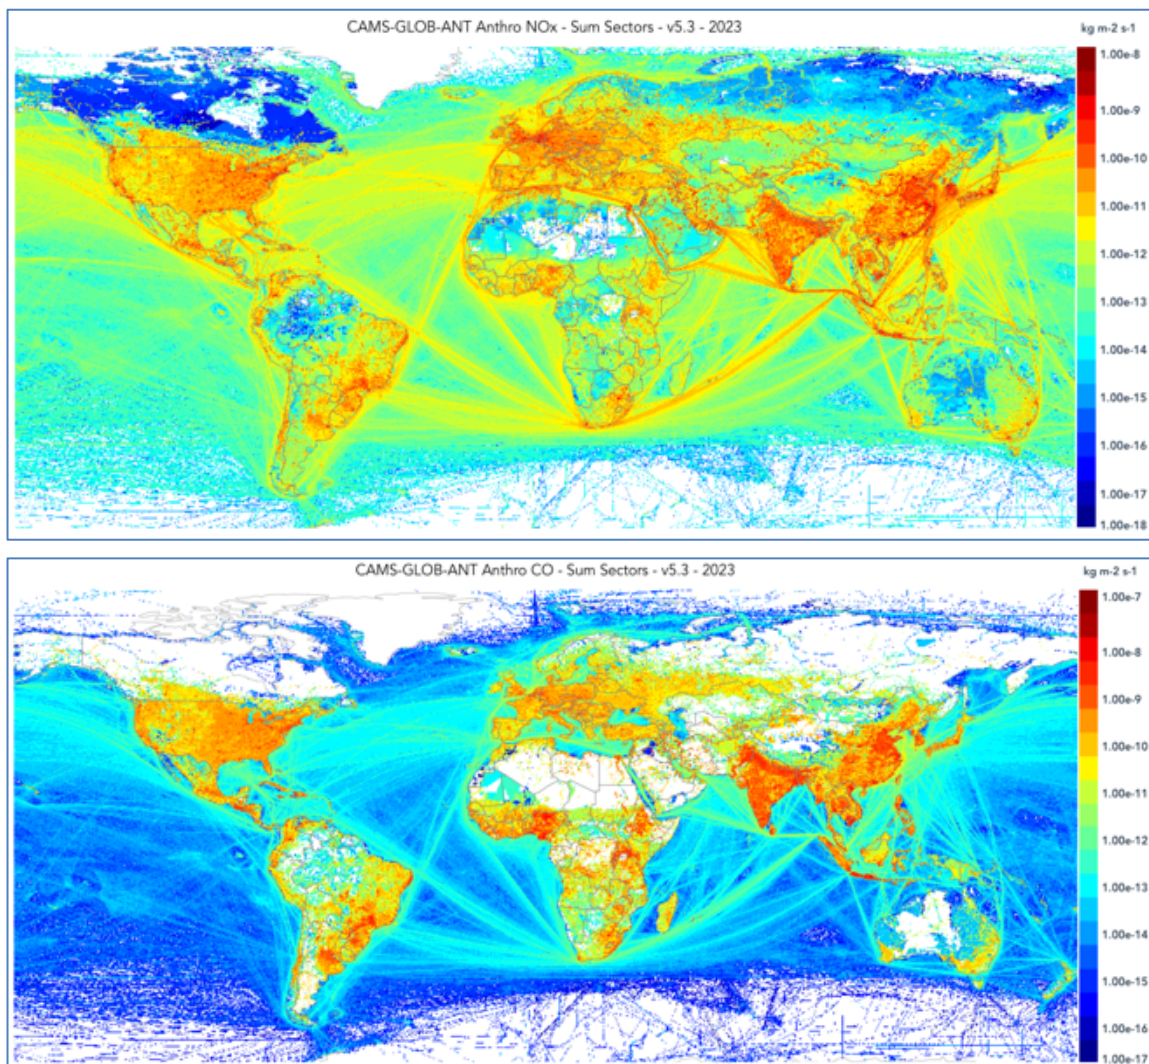

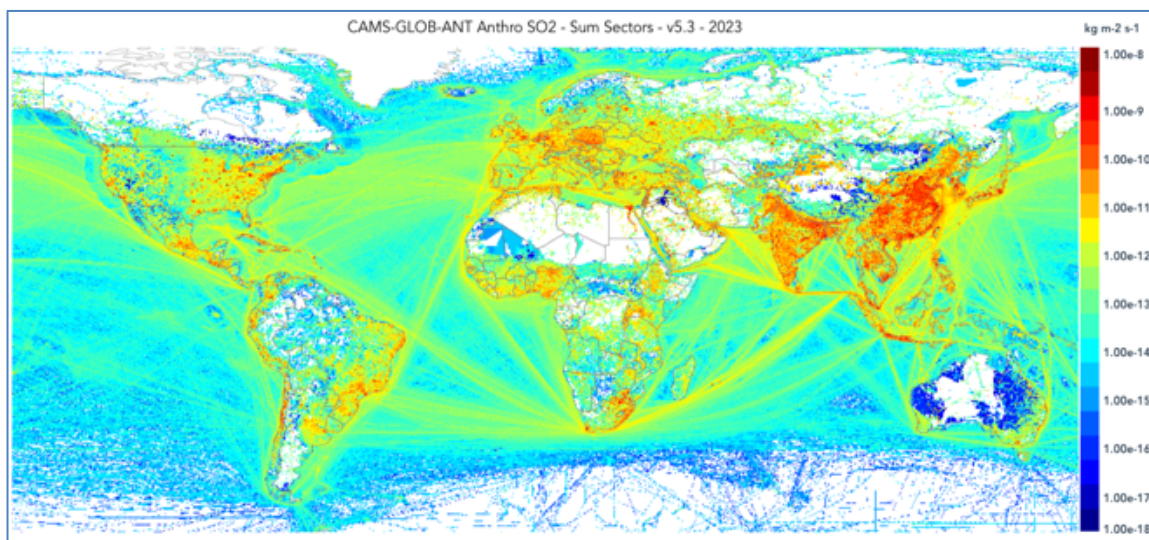

715

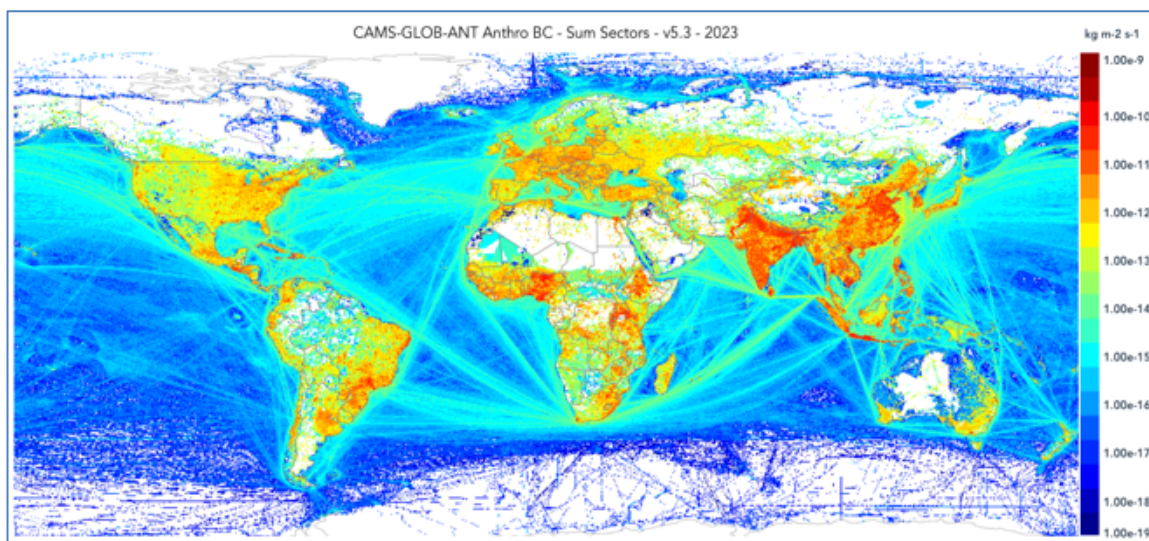

Figure 6: 2023 annual average of the surface emissions of NO<sub>x</sub> (top left), CO (2<sup>nd</sup> from top), SO<sub>2</sub> (3<sup>rd</sup> from top) and BC (bottom), in kg/m<sup>2</sup>/s.

720



725

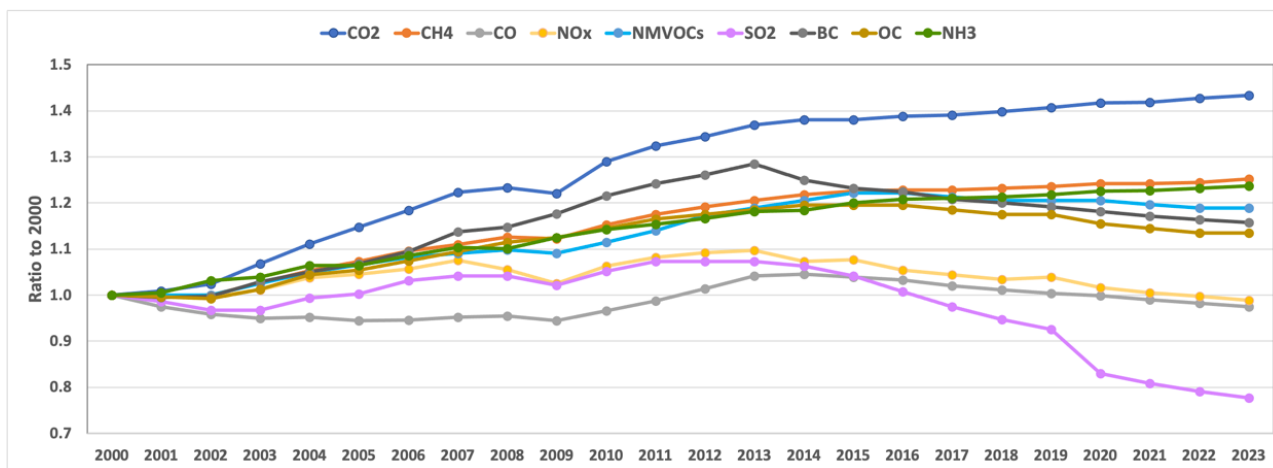

Figure 7: Relative change from 2000 in the global total emission of several species

730

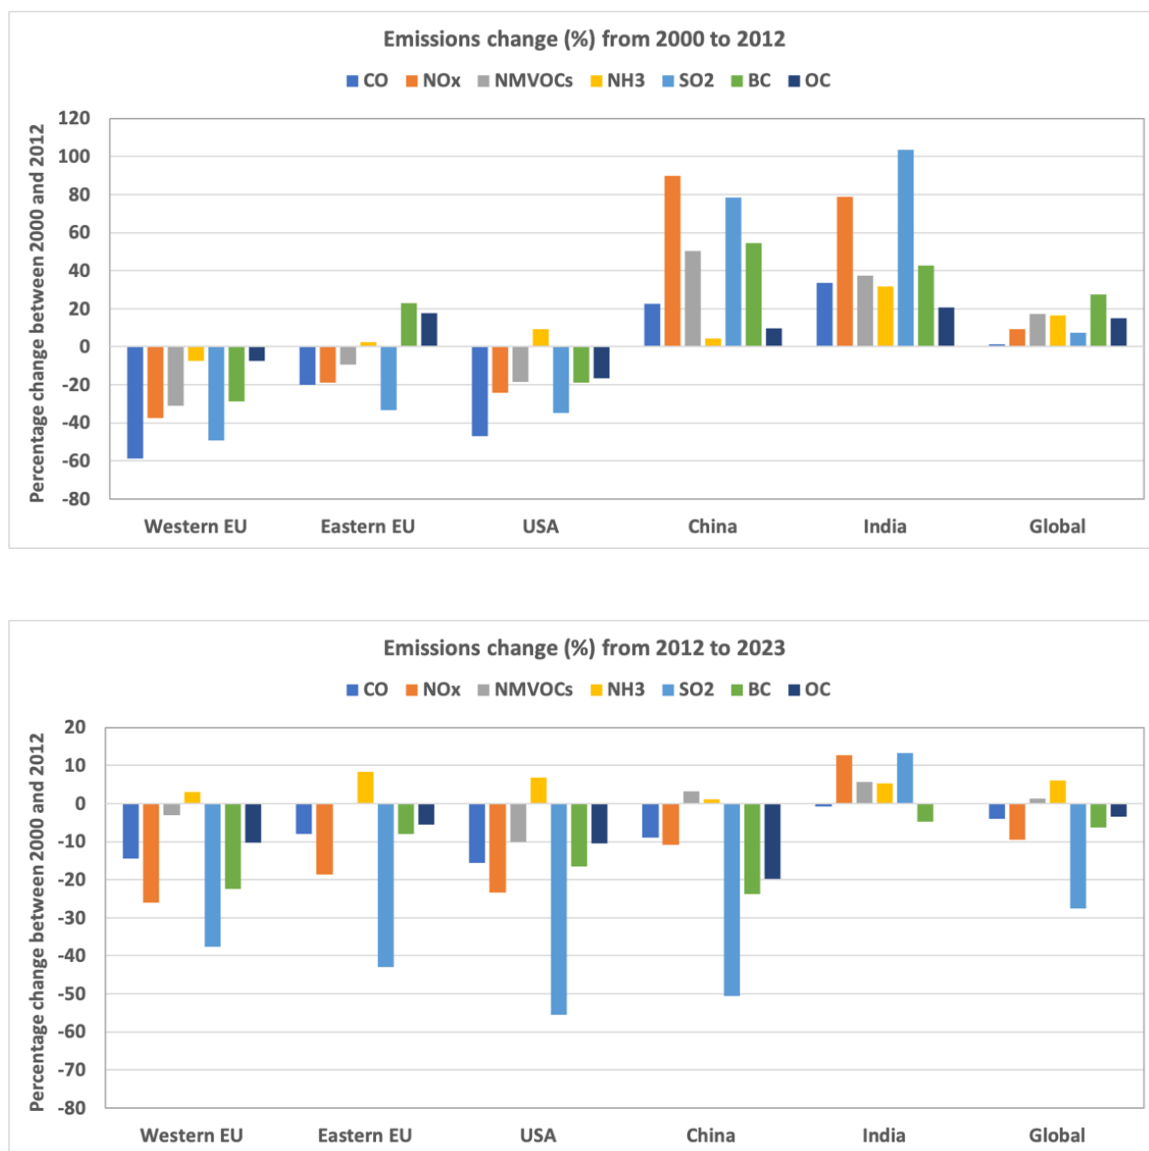

735 Figure 8: percentage change in the emissions of CO, NO<sub>x</sub>, NMVOCs, NH<sub>3</sub>, SO<sub>2</sub>, BC and CO  
 740 from 2000 to 2012 (top) and 2012 to 2023 (bottom).



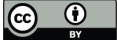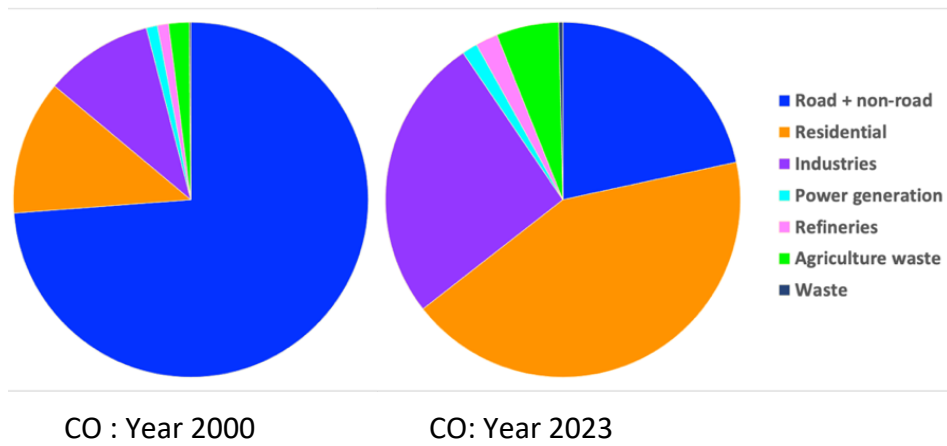

745

Figure 9: contribution of several sectors to the CO emissions in Western Europe in 2000 and 2023.

750

755

760

765



Western Europe co emissions

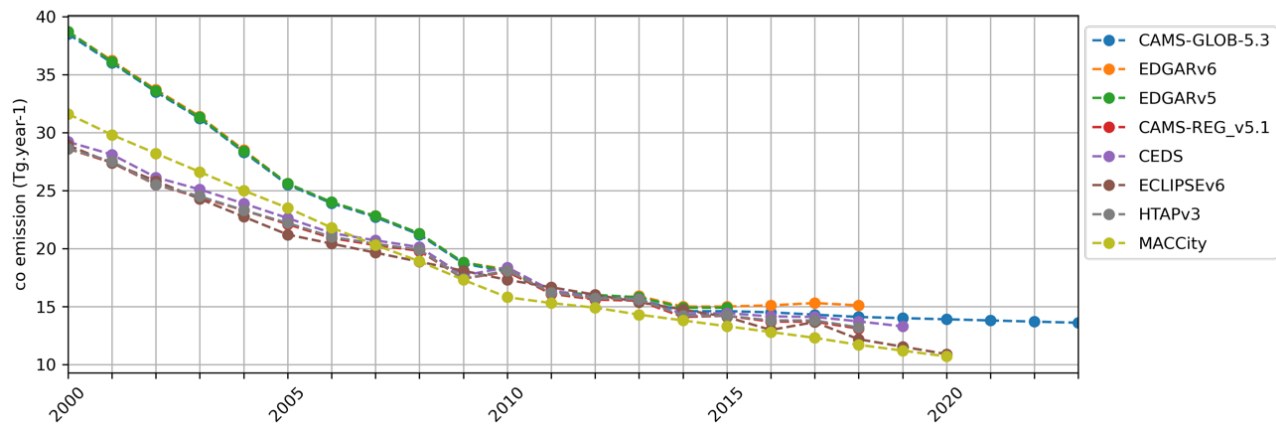

770

Western Europe nox emissions

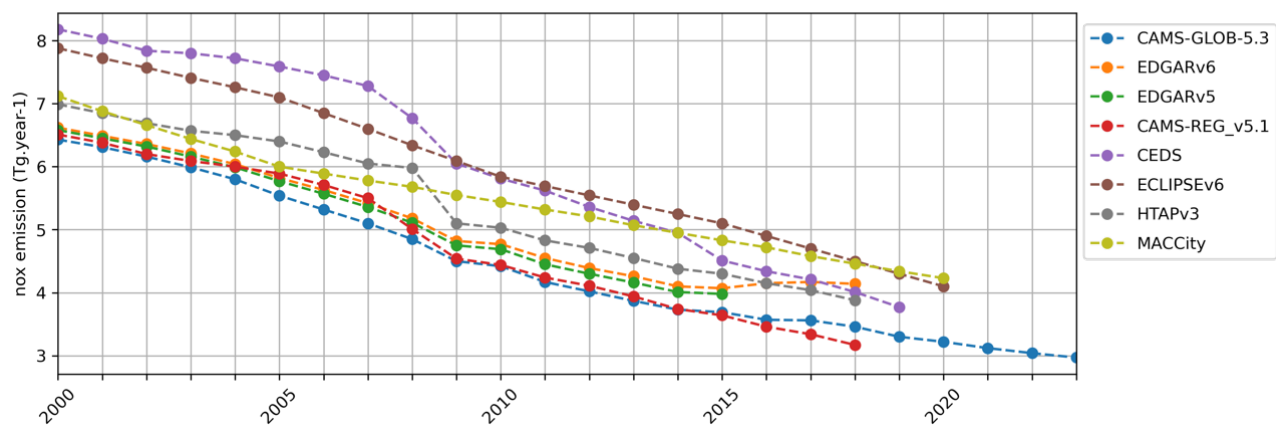

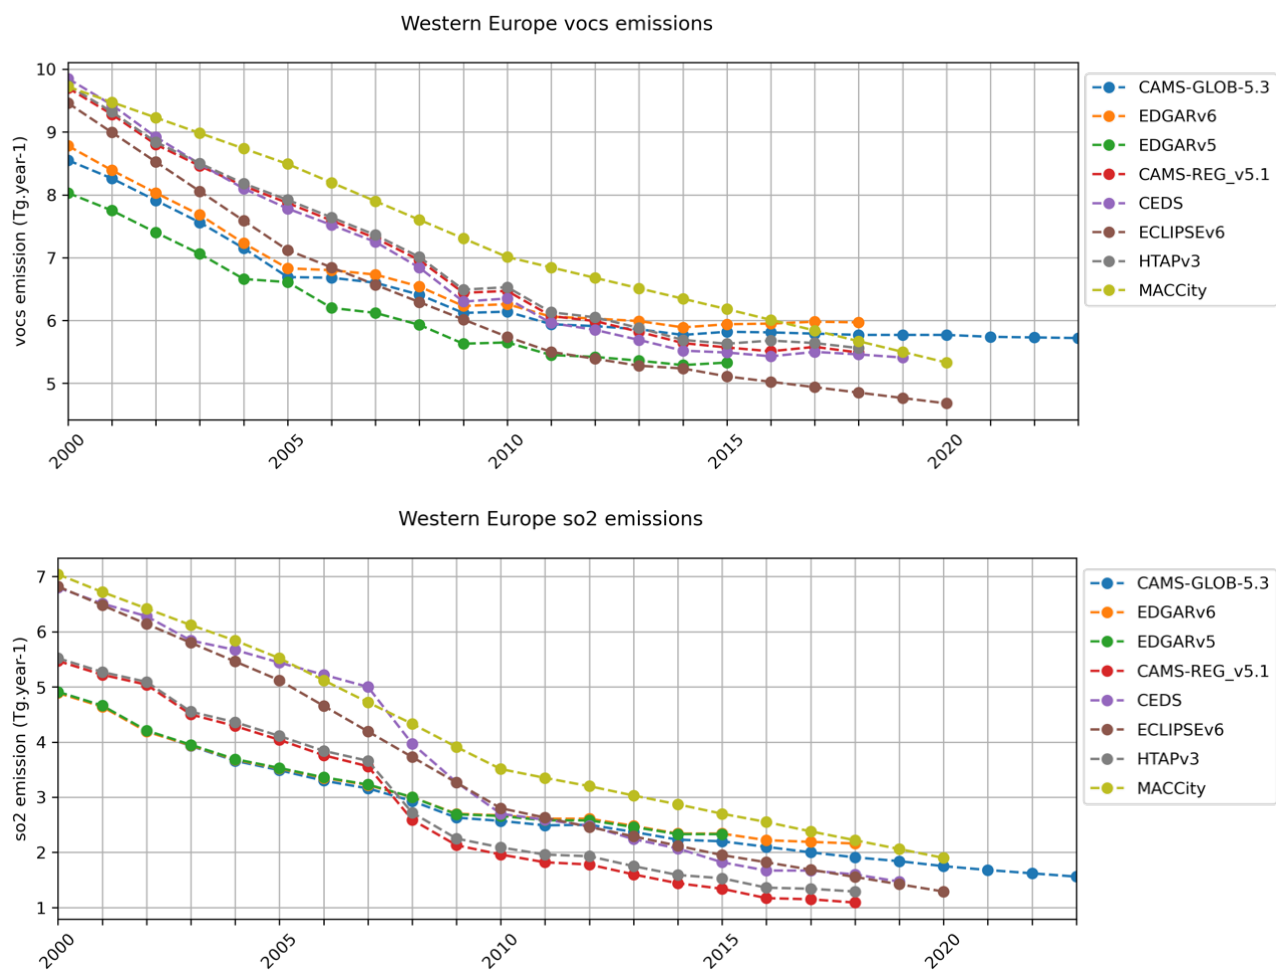

775

Figure 10: comparisons of the CAMS-GLOB-ANT\_v5.3 emissions for CO, NO<sub>x</sub>, NMVOCs and SO<sub>2</sub> with other global datasets and the CAMS-REG\_V5.1 inventory.



780

USA co emissions

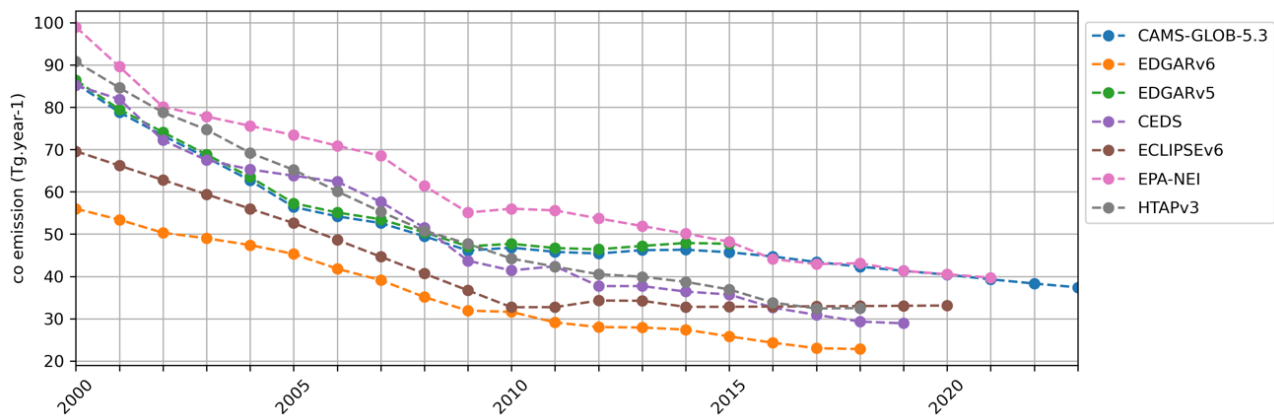

USA nox emissions

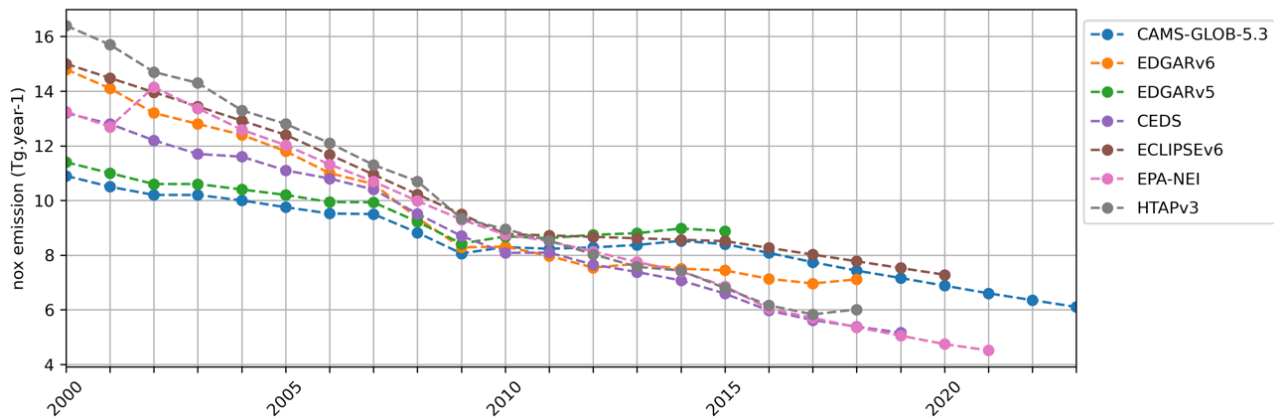



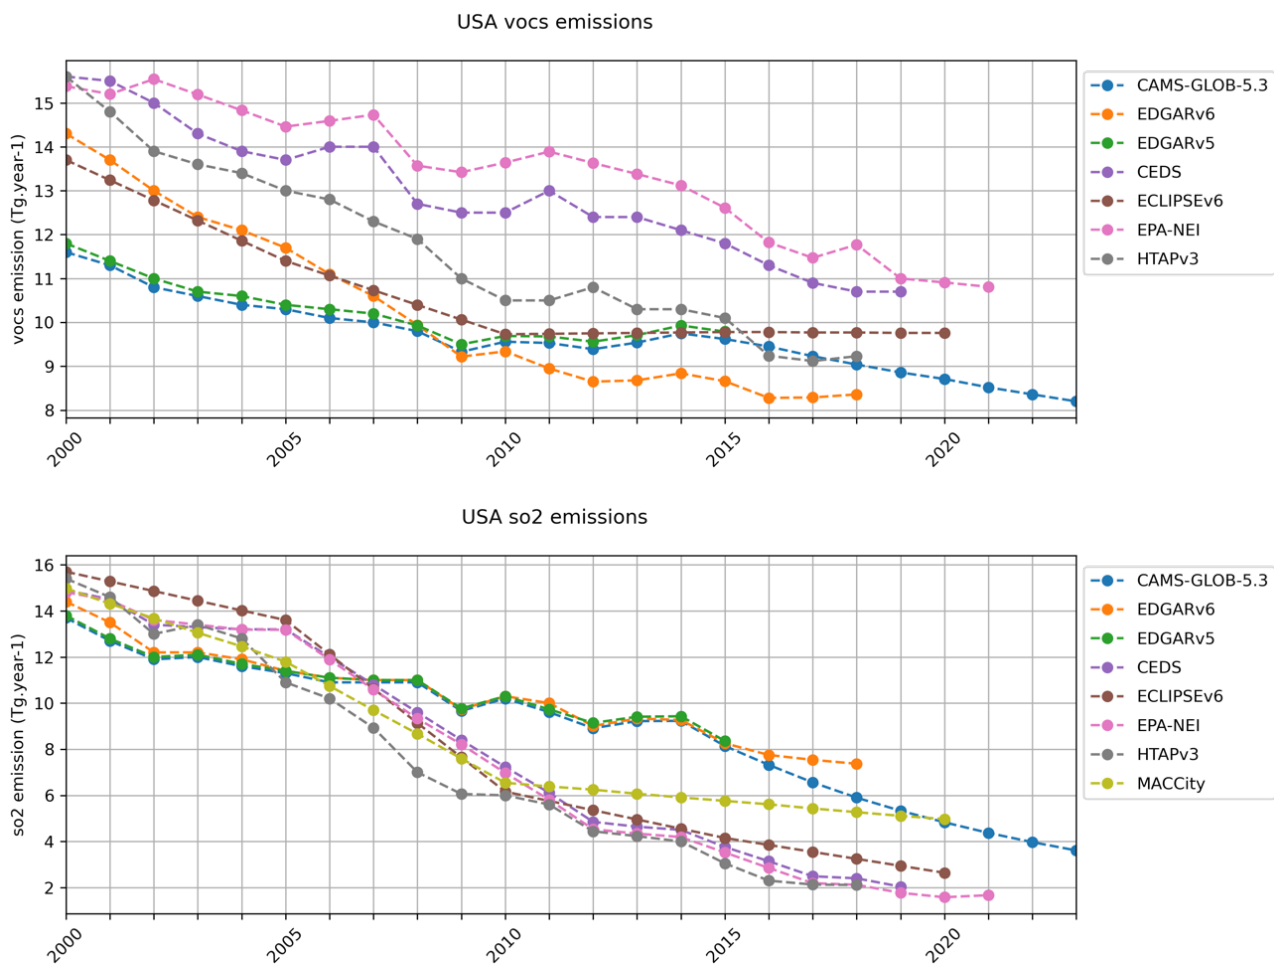

785

Figure 11: comparisons of the CAMS-GLOB-ANT\_v5.3 emissions for CO, NO<sub>x</sub>, NMVOCs and SO<sub>2</sub> with other global datasets and the EPA inventory.



China co emissions

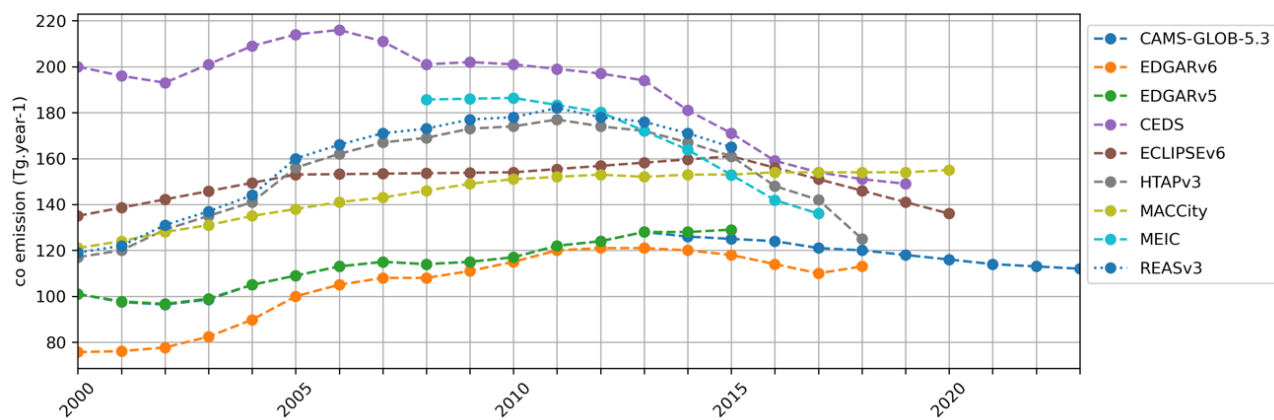

790

China NOx emissions

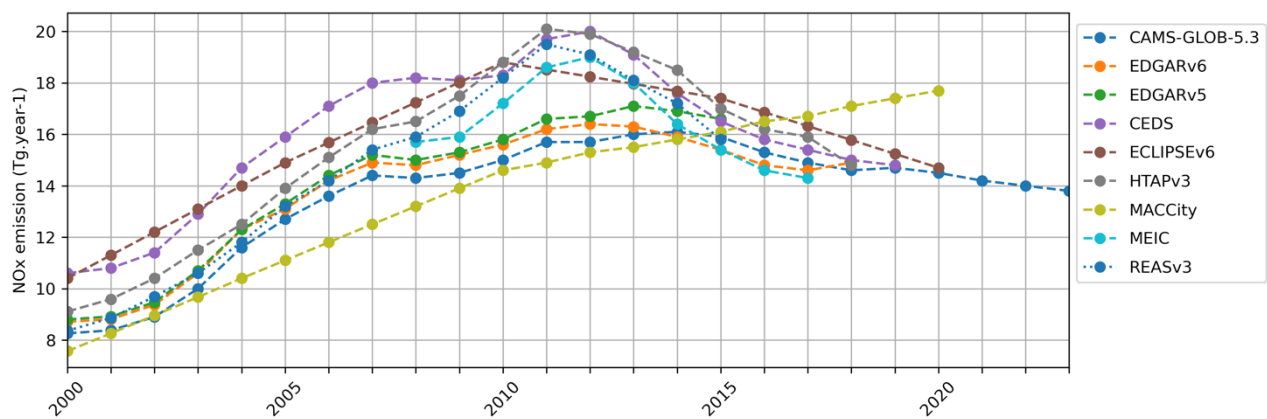

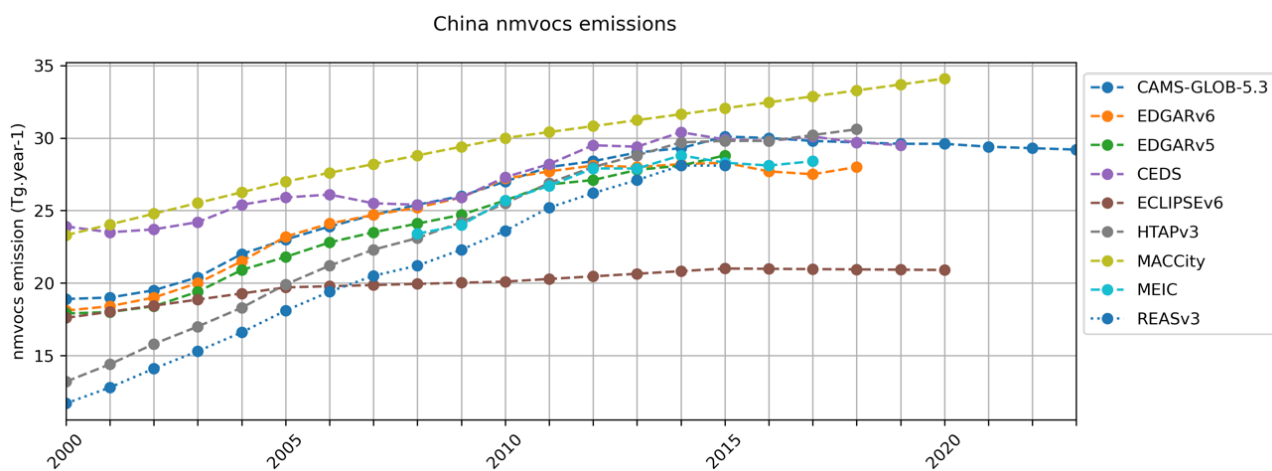

795

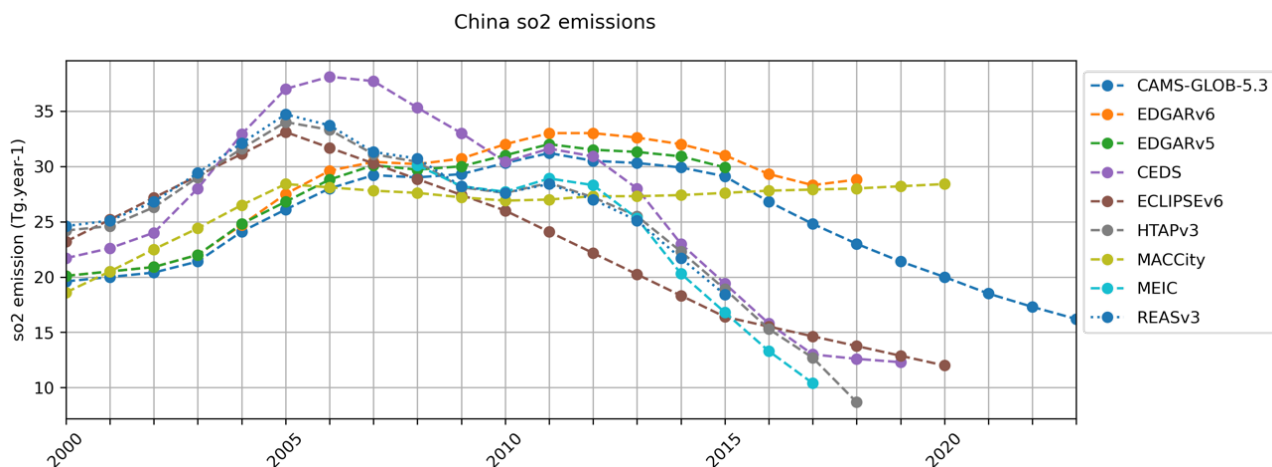

Figure 12: comparisons of the CAMS-GLOB-ANT\_v5.3 emissions for CO, NO<sub>x</sub>, NMVOCs and SO<sub>2</sub> with other global datasets and two regional inventories for China

800



India co emissions

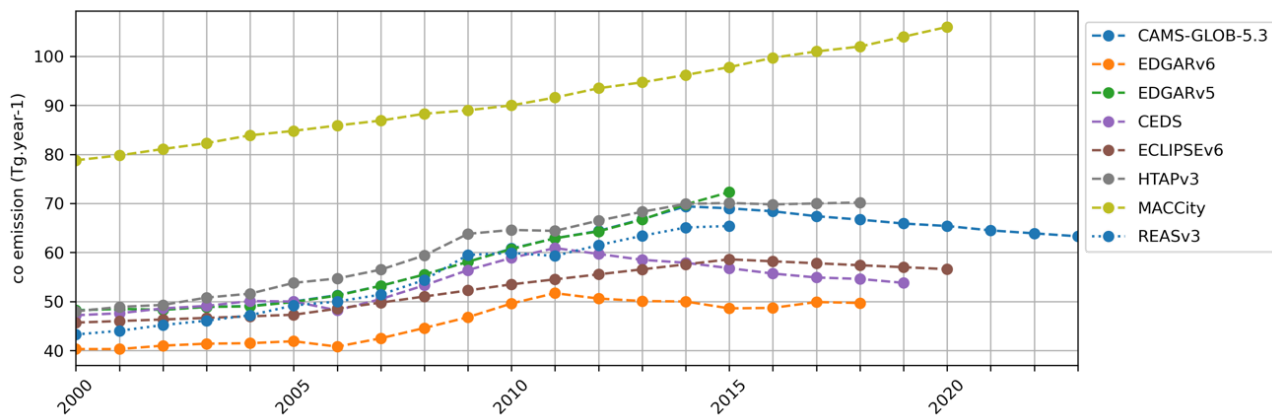

India nox emissions

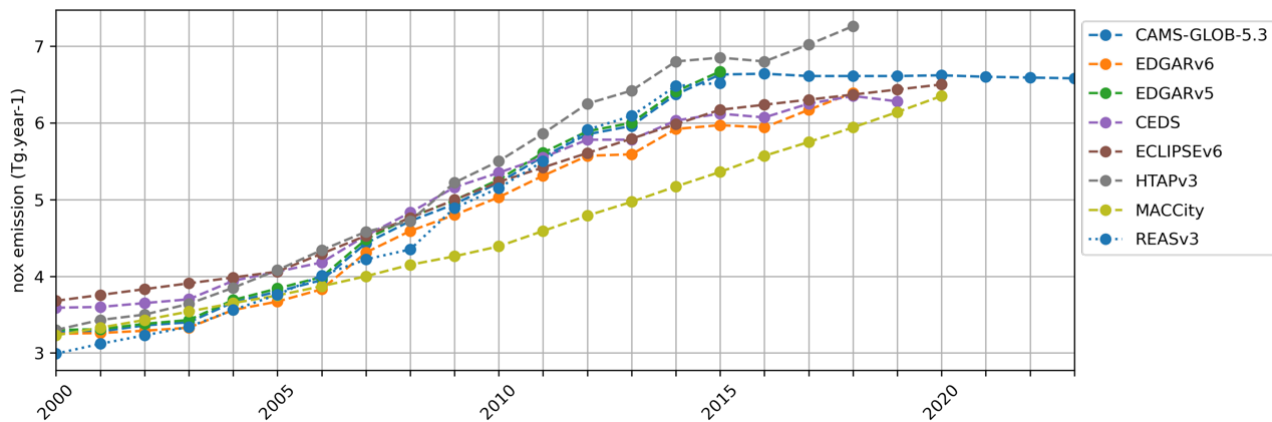

805

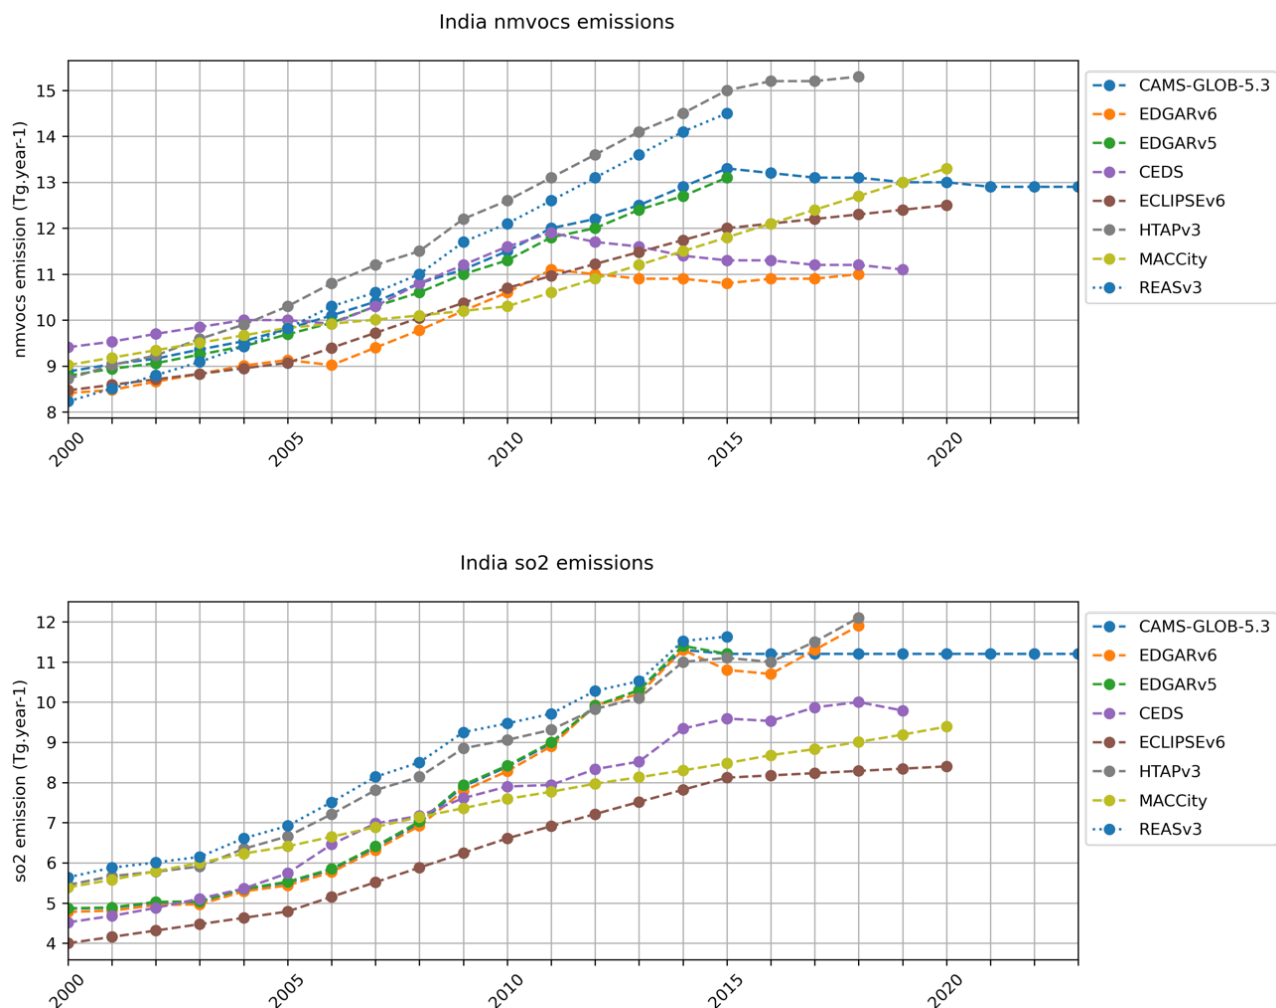

810

Figure 13: comparisons of the CAMS-GLOB-ANT\_v5.3 emissions for CO, NO<sub>x</sub>, NMVOCs and SO<sub>2</sub> with other global datasets and two regional inventories for India.

815
